# Supplementary material
Source: PubMed Central journal article supplement (PMC3795930)
Supplement: NIHMS489653-supplement-1_si_001.pdf [file NIHMS489653-supplement-1_si_001.pdf]

# SUPPLEMENTARY INFORMATION

## Discovery of Cryptic Polyketide Metabolites from Dermatophytes using Heterologous Expression in *Aspergillus nidulans*

Wen-Bing Yin<sup>1</sup>, Yit Heng Chooi<sup>1</sup>, Ralph A. Cacho<sup>1,2</sup>, Youcai Hu<sup>1</sup>, Adam R. Smith<sup>3</sup>, Theodore C. White<sup>3</sup>, Yi Tang<sup>1,2</sup>

<sup>1</sup>Department of Chemical and Biomolecular Engineering, <sup>2</sup>Department of Chemistry and Biochemistry, University of California, Los Angeles, CA 90095, USA, <sup>3</sup>School of Biological Sciences, University of Missouri at Kansas City, Kansas City, Missouri, USA. [yitang@ucla.edu](mailto:yitang@ucla.edu)

Running Title: Dermatophyte Polyketide Metabolite

### Table of Contents

#### Supplementary Figures

Figure S1. Strategies for assembling of DNA fragment in yeast and transformation of *A. nidulans*

Figure S2. Backside phenotypes of control strain and dermatophyte cluster transformants in *A. nidulans*

Figure S3. LC-MS analysis of *A. nidulans* mutants

Figure S4. UV absorption and masses of neosartoricins C and D

Figure S5. RT-PCR analysis of dermatophyte gene transcription in *A. nidulans* mutants

#### Supplementary Tables

Table S1. Fungal strains and plasmids used in this study

Table S2. PCR primer sets utilized in this study

Table S3. Genes and enzymes predicted through deep bioinformatic annotation of the putative *nrc*-like cluster in fungi

Table S4. NMR assignment for neosartoricin B in CDCl<sub>3</sub>

Table S5. NMR assignment for neosartoricin C in CDCl<sub>3</sub>

Table S6. NMR assignment for neosartoricin D in CDCl<sub>3</sub>

#### Supplementary NMR spectra for neosartoricin B

#### Supplementary NMR spectra for neosartoricin C

#### Supplementary NMR spectra for neosartoricin D

#### Supplementary References

37 **Supplementary Figures**

38

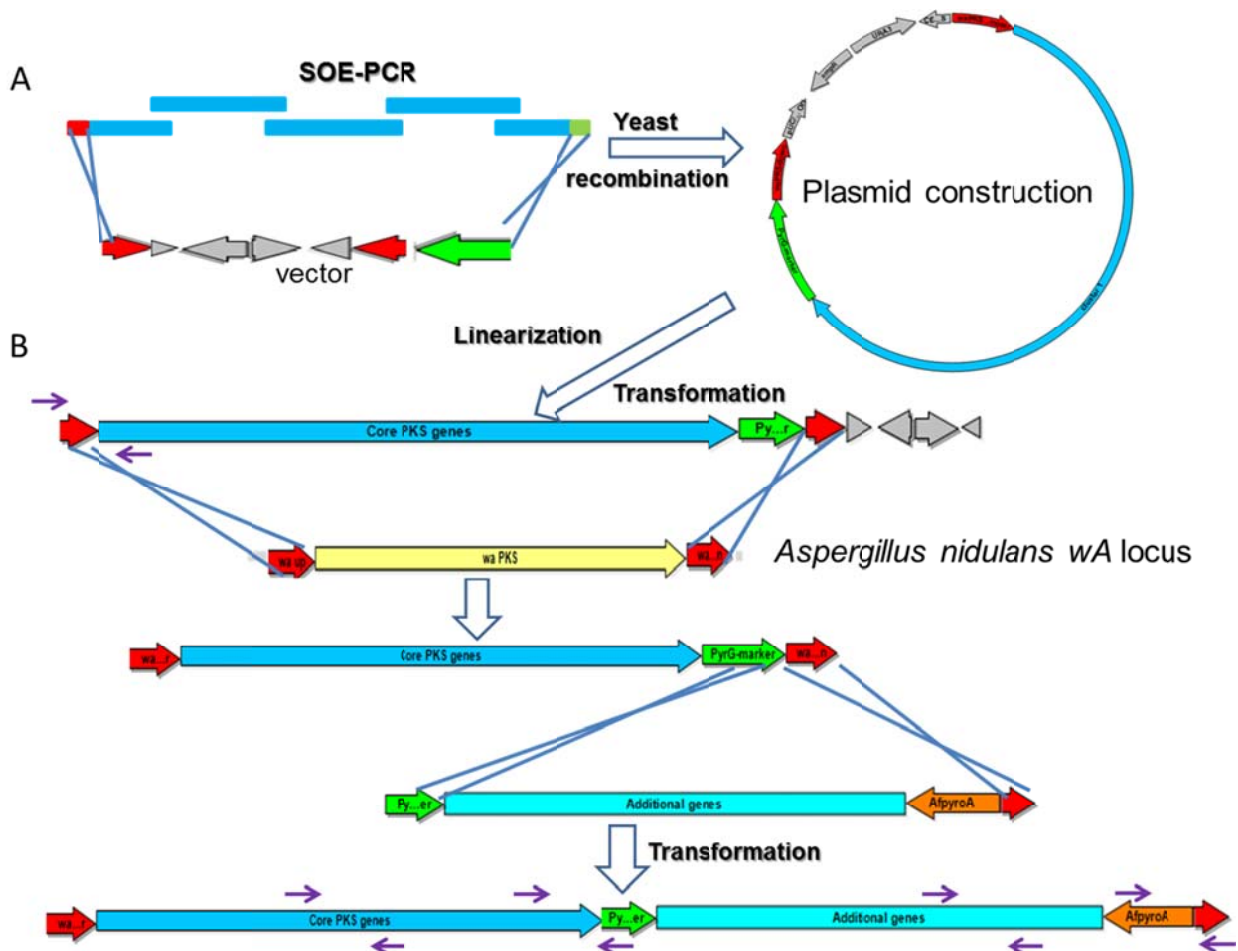

39

40

41

42 **Figure S1. Strategies for assembling of DNA fragment in yeast and transformation**  
 43 **of *A. nidulans***

44 (A) SOE PCR and yeast homologous recombination were used for assembling of large DNA  
 45 fragments as described previously (1). (B) Transformation was performed by replacing of *A.*  
 46 *nidulans* *wA* PKS gene with targeted core PKS genes plus *A. fumigatus* *pyrG* (A<sub>fpyrG</sub>) maker  
 47 for the first part of DNA fragment integration. The second integration of DNA fragment with *A.*  
 48 *fumigatus* *pyroA* (A<sub>fpyroA</sub>) was inserted to the same *wA* locus with 1 kb flanking regions of  
 49 A<sub>fpyrG</sub> and *wA*. The recipient strain is RJMP1.49 (*pyrG89*, *pyroA4*,  $\Delta$ *nkuA::argB*, *veA*). The  
 50 screening of transformants is performed by picking white spore strains in combination with  
 51 diagnostic PCR using primers as shown in purple arrows.  
 52

53  
54  
55  
56  
57  
58  
59  
60  
61  
62  
63  
64  
65  
66  
67  
68  
69  
70  
71  
72

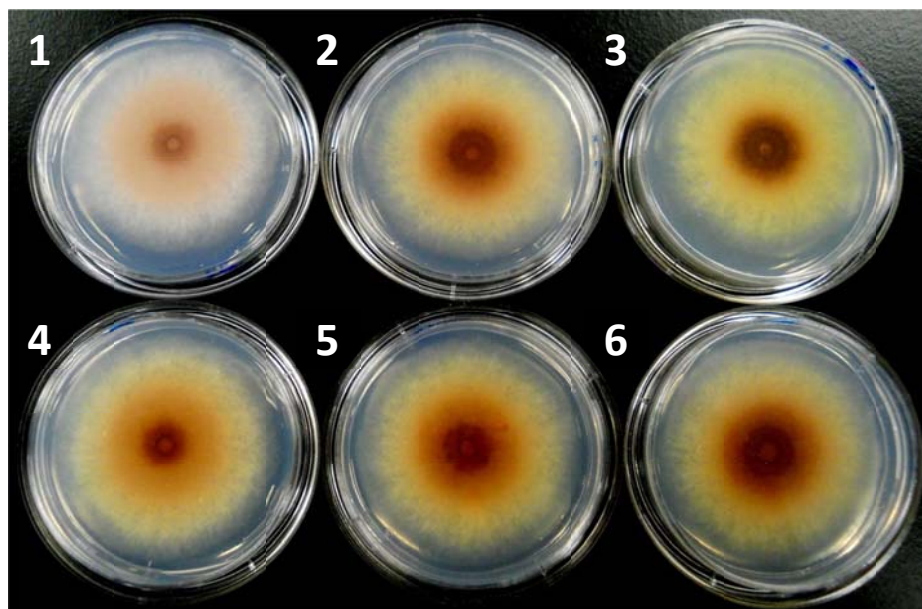

73 **Figure S2. Phenotypes of control strain and dermatophyte cluster transformants**  
74 **in *A. nidulans*.**

75 Strains were point-inoculated and grown on minimal medium for 3 days at 37 °C. 1: CK  
76 (TWY2.2), 2: TESH\_06695 to 6702 (TWY1.1), 3: MCGY\_03596 to 3602 (TWY3.3), 4:  
77 TESH\_06695 to 6706 (TWY7.1), 5: TESH\_06695-6706 (-6696) (TWY8.1), 6: TESH\_06695 to  
78 6702 (+6701) (TWY9.1).  
79

80

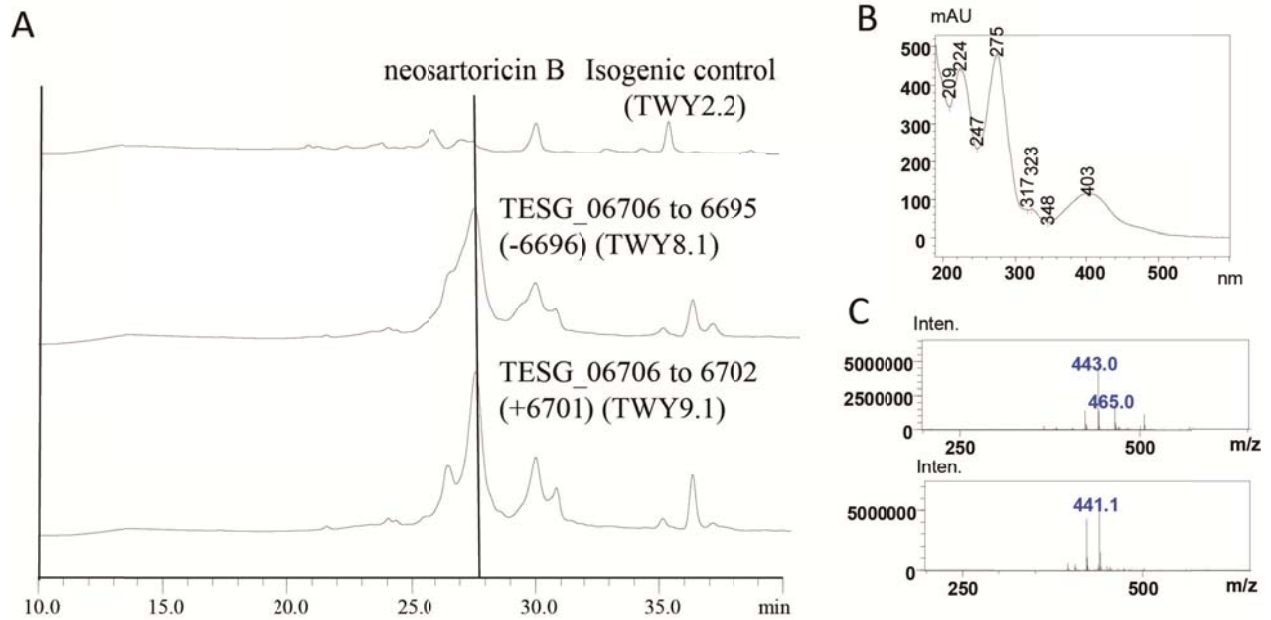

81  
82

83 **Figure S3. LC-MS analysis of *A. nidulans* mutants.**

84 (A) HPLC traces (400 nm) of organic extracts from different strains. Trace 1: isogenic control  
85 (TWY2.2); Trace 2: TSWG\_06706 to 6695 (-6696) (TWY8.1); Trace 3: TSWG\_06706 to 6702  
86 (+6701) (TWY9.1); (B) UV absorption of neosartoricin B; (C) Positive and negative masses of  
87 neosartoricin B, m/z 443.0  $[M+H]^+$ , 465.0  $[M+Na]^+$ , 441.1  $[M-H]^-$ .

88

89  
90  
91

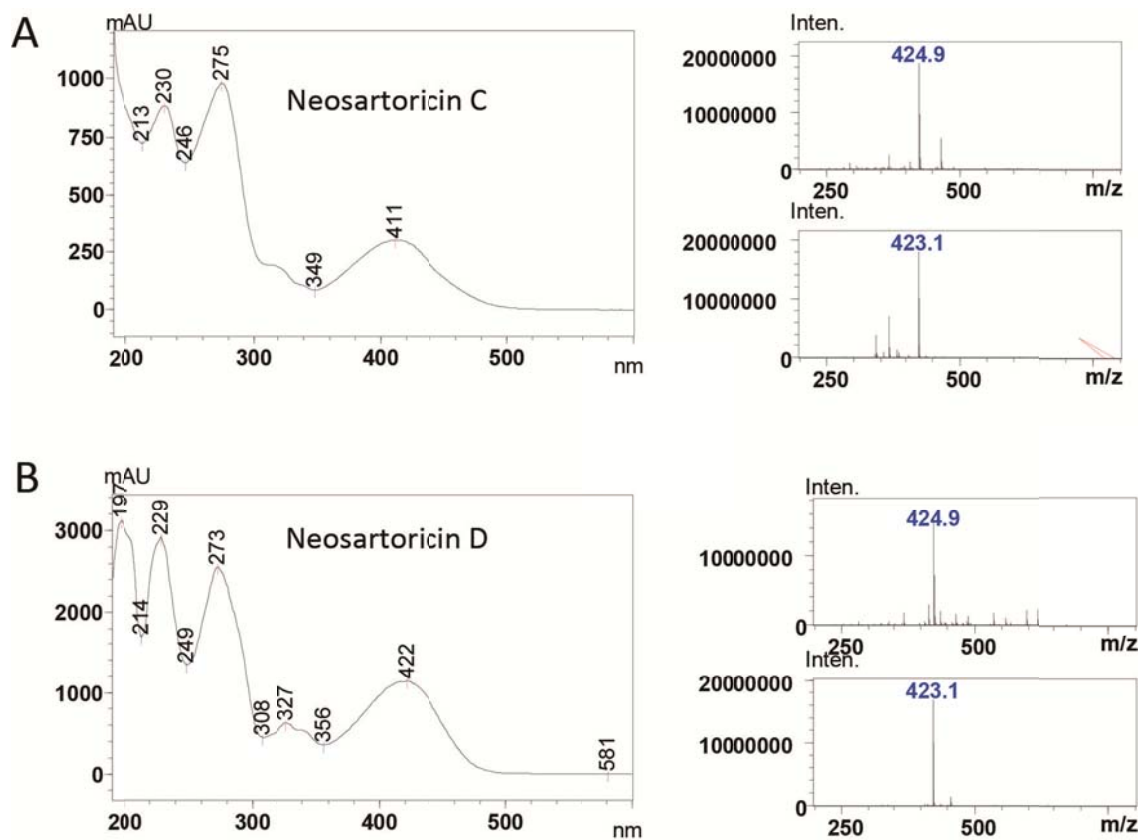

92

93 **Figure S4. UV absorption and masses of neosartoricins C and D.**

94 (A) UV absorption, positive and negative masses of neosartoricin C, m/z 424.9 [M+H]<sup>+</sup>, 423.1

95 [M-H]<sup>-</sup>; (B) UV absorption, positive and negative masses of neosartoricin D, m/z 424.9 [M+H]<sup>+</sup>,

96 423.1 [M-H]<sup>-</sup>.

97

98  
99  
100  
101  
102  
103  
104  
105  
106  
107  
108  
109  
110  
111  
112  
113  
114  
115  
116  
117  
118  
119  
120  
121

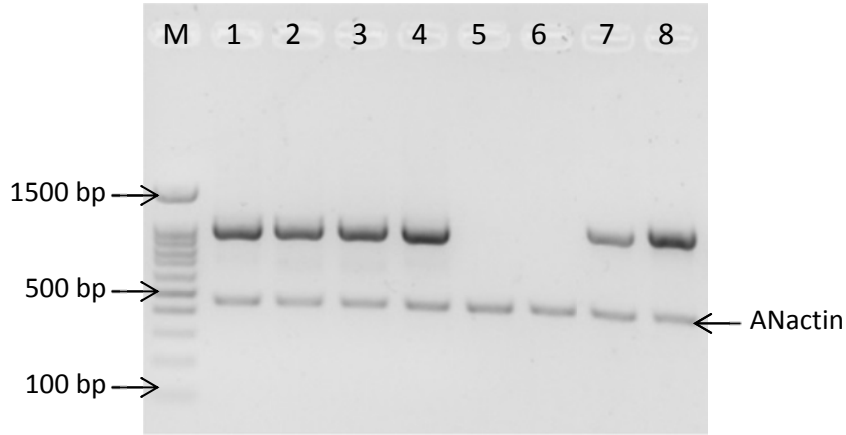

**Figure S5. RT-PCR analysis of dermatophyte gene transcription in *A. nidulans* mutants**

RT-PCR products were loaded into 1.5 % agarose gel. ANactin from *A. nidulans* was used for the relative quantification of the cDNA template. Lane M: 100 bp DNA Ladder (lamda Biotech); lane 1 and 2: TF1 (TESG\_06706) and NR-PKS (TESG\_06702) from TWY1.1; lane 3 to 6: TF1, NR-PKS, TEGS\_06698 and TEGS\_06701 from TWY7.1; lane 7 and 8: MCYG\_03602 and MCYG\_03598 from TWY3.3.

122 **Supplementary Tables**123 **Table S1. Fungal strains and plasmids used in this study**

| Strain/plasmid | Description                                                                                                              | Reference             |
|----------------|--------------------------------------------------------------------------------------------------------------------------|-----------------------|
| RJMP1.49       | <i>pyrG89, pyroA4, ΔnkuA::argB, veA</i>                                                                                  | Yin <i>et al.</i> (2) |
| TWY1.1         | <i>pyroA4, pyrG89, ΔwApks::gpdA(p)::TESG_06706 to 6702::AfpYrG, ΔnkuA::argB, veA</i>                                     | This study            |
| TWY2.2         | <i>pyroA4, pyrG89, ΔwApks::AfpYrG, ΔnkuA::argB, veA</i>                                                                  | This study            |
| TWY3.3         | <i>pyroA4, pyrG89, ΔwApks::gpdA(p)::gpdA::MCYG_03602 to 3596::AfpYrG, ΔnkuA::argB, veA</i>                               | This study            |
| TWY7.1         | <i>pyroA4, pyrG89, ΔwApks::gpdA(p)::TESG_06706 to 6702::AfpYrG::TESG_06701 to 6695::AfpYroA, ΔnkuA::argB, veA</i>        | This study            |
| TWY8.1         | <i>pyroA4, pyrG89, ΔwApks::gpdA(p)::TESG_06706 to 6702::AfpYrG::TESG_06701 to 6695(-6696)::AfpYroA, ΔnkuA::argB, veA</i> | This study            |
| TWY9.1         | <i>pyroA4, pyrG89, ΔwApks::gpdA(p)::TESG_06706 to 6702::AfpYrG::TESG_06701::AfpYroA, ΔnkuA::argB, veA</i>                | This study            |
| pYH-WA-pyrG    | <i>URA3, WA flanking, AfpYrG, Amp</i>                                                                                    | This study            |
| pWY13.2        | <i>gpdA::TESG_06706 to 6702 in pYH-WA-pyrG</i>                                                                           | This study            |
| pWY14.1        | <i>gpdA::MCYG_03602 to 3596 in pYH-WA-pyrG</i>                                                                           | This study            |
| pWY15          | <i>TESG_06701 to 6695 in pYH-WA-pyrG</i>                                                                                 | This study            |
| pWY16          | <i>TESG_06701 to 6695(-6696) in pYH-WA-pyrG</i>                                                                          | This study            |
| pWY17.1        | <i>TESG_06701AfpYroA in pYH-WA-pyrG</i>                                                                                  | This study            |

124 pXX = plasmid, TXX = original transformant

125

126 **Table S2. PCR primer sets utilized in this study**

| Name of the primer | Oligonucleotide sequence (5'-3')                                 | Uses                                         |
|--------------------|------------------------------------------------------------------|----------------------------------------------|
| pYUCA-wAup-F       | GATACGAGGCGCGTGTAAGTTACCTCTGGAACAGT<br>CTCGCCGT                  | Wapks upstream amplification                 |
| pyrG-wAup-R        | CATATTTTCGTGACACACAGAATAACTCTCGCTAGCG<br>ATCAGGAGAAGGAGAGTCAAGTC |                                              |
| wAup-pyrG-R        | GACTTGACTCTCCTTCTCCTGATCGCTAGCGAGAG<br>TTATTCTGTGTCTGACGAAATATG  | AfpyrG amplification                         |
| wAdn-pyrG-R        | TGTCATAGTAAAGTGATTCGCGTCATGCGGCCGCA<br>TTCTGTCTGAGAGGAGGCACTG    |                                              |
| pyrG-wAdn-F        | CAGTGCCTCCTCTCAGACAGAATGCGGCCGCATGA<br>CGCGAATCACTTTACTATGACA    | wAPKS downstream amplification               |
| pEamp-wAdn-R       | GTTCTTTCTGCGTTATCCCCTGTGCTGTCAGTACG<br>CGAAGATCT                 |                                              |
| wAdn-pEamp-F       | AGATCTTCGCGTACTGACAGCACAGGGGATAACGC<br>AGGAAAGAAC                | pMB1 Ori + AmpR amplification                |
| pYUCA-pEamp-R      | TGGACCCTGATAACTTCGTATAATGTATGGCTCATG<br>AGACAATAACCCTGA          |                                              |
| pEamp-pYUCA-F      | TCAGGGTTATTGTCTCATGAGCCATACATTATACGA<br>AGTTATCAGGGTCCA          | CEN/ARS + ura3 amplification                 |
| wAup-pYUCA-R       | ACGGCGAGACTGTTCCAGAGGTAACCTACACGCGC<br>CTCGTATC                  |                                              |
| pgpdA_F            | GTCTGCTCATAGAAGATCGC                                             | gpdA amplification                           |
| pgpdA_R            | TTTGGTTTCGTTTCTCCATGTCCGGTTCTGTGCTGA<br>ATAGCGATTAAGGTTCTTGGATG  |                                              |
| p1MCY_F            | CTATTCAGCACAGAACCGGAC                                            | SOE PCR for MCYG_03602 to 3596 amplification |
| p1MCY_R            | CGGCTGTGTTTGAGAATAAGGC                                           |                                              |
| p2MCY_F            | GCATCCACAGCTACAGAGCAG                                            |                                              |
| p2MCY_R            | GTGTAGCACTTGTCGGTAGTTG                                           |                                              |
| p3MCY_F            | GAGGATGCGGAAGCTGACAATG                                           |                                              |
| p3MCY_R            | GCCTCATGTTCCAGAGCATGAC                                           |                                              |
| p4MCY_F            | CGCTGCAGAAACCTGTCTGAG                                            |                                              |
| p4MCYpyrG_R        | ACACAACATATTTTCGTGACACAGAATAACTCTCG<br>CTAGCCTATGTCTTACCGATCTGC  |                                              |
| pScr1_F            | CAACCTGAGGAAACTGCGTC                                             | MCYG_03602 to 3596 screening                 |
| pScr1_R            | CTATCTCGATCTTTTCCGCG                                             |                                              |
| pScr2_F            | CTCTGGCCCGTCATTCAATC                                             |                                              |
| pScr2_R            | GCTTTCTGAAGCGCTGGAATG                                            |                                              |
| pgpdAttr_R         | GAGCAGCTTGCTGCCGTCGTTTTGGGCCTCGTTTC<br>TCCATCGATTAAGGTTCTTGGATG  | SOE PCR for TEGS_06706 to 6702 amplification |
| p1TTR_F            | ATGGAGAAACGAGGCCCAAAC                                            |                                              |
| p1TTR_R            | CAAGAGGCTGTTTCGACGGTC                                            |                                              |
| p2TTR_F            | GGAAGTGTGTATGACTTGGGAG                                           |                                              |
| p2TTR_R            | CGATGGTAGCAAGAATCCGATC                                           |                                              |
| p3TTR_F            | CATGCTGTTCCAAATGGCGAAC                                           |                                              |
| p3TTR_R            | GCATTCGACGAGAAGACGTAG                                            |                                              |
| p4TTR_F            | GCACGGAAGATCGTATCACTC                                            |                                              |
| p4TTRpyrG_R        | CACAACATATTTTCGTGACACAGAATAACTCTCG<br>TAGCGATGATATCAATCACTCTGC   |                                              |
| p5TTR_F            | TTGGCATCACGCATCAGTGCCTCCTCTCAGACAGA                              | SOE PCR for                                  |



|               |                                       |                          |
|---------------|---------------------------------------|--------------------------|
| p5TTR_R       | ATGCATCGGGATTGATTATCAAATG             | TESG_06701 to            |
| p6TTR_F       | GCATACTTGCCAGAATTTGCAG                | 6695 amplification       |
| p6TTR_R       | CTTACTACAAAAGTCCCTTGC                 |                          |
| p6AbTv_R      | GTTTCAGTTAATTCTCCCTTTC                |                          |
|               | AGGATGCTGATAACTAGTTAACGTAACGGCATGCT   | SOE PCR for              |
|               | GGAGTTTCAGTTAATTCTCCCTTTC             | TESG_06701 to            |
| p7TTR_F       | GATATTTATCGTCCGCTGTAAG                | 6695(-6696)              |
| p7AbTv_F      | GCTCTTCTCGCAGCGGGAAAGGGAGAATTAAGTGA   | amplification            |
|               | AACTCCAGCATGCCGTTACGTTAAC             |                          |
| p7TTR_R       | CGTTTATTTACAAACGCCGAAGTTGAATACACACCC  |                          |
|               | TGGTCTCGCTAACTAACTAACCAG              |                          |
| pAfpYRO_A_F   | CGGAGCATCTAGCTAGCTGGTTAGTTAGTTAGCGA   | <i>A fumigatus</i> pyroA |
|               | GACCAGGGTGTGTATTCAAGTTCGG             | amplification            |
| pAfpYRO_A_R   | CCTTTTCGCCCTTTGTCATAGTAAAGTGATTCCGCGT |                          |
|               | CATGAGTGTTCCGCTTGGCATGCG              |                          |
| ppyrscr_F     | CCAGTCATCTAGCAAGTGAG                  | screening and            |
| p5Ttscr_R     | GGCAAGTGGACAATCTGTTC                  | sequencing               |
| ppyroscr_F    | GTAACATCCTCTTCTGAGATCG                |                          |
| ppyroscr_R    | GATGTCCCTATGAATAAACCCG                |                          |
| ppyroseq_R    | CTGAGACCACTACCCAGTTG                  | sequencing               |
| pTtDo_F       | TGGCATCACGCATCAGTGCCTCCTCTCAGACAGAA   | TESG_06701               |
|               | TGCCATTGCCAGGGATTCTATTTT              | amplification            |
| pTtDo_R       | ACGTTTATTTACAAACGCCGAAGTTGAATACACACC  |                          |
|               | CTGGTTTCCTAGAGGTAAGTATTG              |                          |
| pAfpYRO_Ado_F | TACTTTACTTAACAGATCAATAGTTACCTCTAGGAA  |                          |
|               | ACCAGGGTGTGTATTCAAGTTCGG              |                          |
| pWAscr_F      | GAGTTACGACCGGCCGAATG                  | transformant             |
| pgpdAscr_R    | CACACCAGCCTTTCCACTTC                  | screening                |
|               |                                       |                          |
| pWY15Scr_F    | GATGCGACATTAGCTCGTG                   | transformant             |
| pWY15Scr_R    | CAGGATCTCGCAGAGAGC                    | screening                |
| pWY16Scr_R    | CGCATCATAATCGTGGAC                    |                          |
| AfpYrG_F      | GAGAGTTATTCTGTGTCTGAC                 | <i>A fumigatus</i> pyroA |
| AfpYrG_R      | CTGTCTGAGAGGAGGCACTG                  | screening                |
| Tt6698_F      | CCCTTTGTCTCCTTGATC                    | RT-PCR                   |
| Tt6698_R      | ATGCGCGTCTCGATCATC                    | RT-PCR                   |
| Tt6701_F      | CCTTGGGTCGATATTCCAG                   | RT-PCR                   |
| Tt6701_R      | CAGATGATGTGAAGGAGC                    | RT-PCR                   |
| Tt6702_F      | CCAGGACAGAGTGTTCTC                    | RT-PCR                   |
| Tt6702_R      | GTCTGTGTTGCGTTTTCCG                   | RT-PCR                   |
| Tt6706_F      | GAGGTCAGAGGATCCAAG                    | RT-PCR                   |
| Tt6706_R      | GCTGTCTGTTCCAAGACCAG                  | RT-PCR                   |
| Mc3598_F      | GTTCCATCGCGAAGTGTG                    | RT-PCR                   |
| Mc3598_R      | CCTGCATCAAAATAGCCTG                   | RT-PCR                   |
| Mc3602_F      | CGTATGGACGTTAATGGC                    | RT-PCR                   |
| Mc3602_R      | GTGAAAGCTCTGTTGCTG                    | RT-PCR                   |
| ANactin_F     | GATCGGTATGGGTCAGAAGGAC                | RT-PCR                   |
| ANactinM_R    | CTTCATCAGGTAGTCCGTCAGG                | RT-PCR                   |

**Table S3. Genes and enzymes predicted through deep bioinformatic annotation of the putative *nrc*-like cluster in fungi**

| Protein                                  | Identity (%) to genes of               |                                         |                                         |                                       |                                       |                                    |                                      |                                    | putative function                             |
|------------------------------------------|----------------------------------------|-----------------------------------------|-----------------------------------------|---------------------------------------|---------------------------------------|------------------------------------|--------------------------------------|------------------------------------|-----------------------------------------------|
| <i>Trichophyton tonsurans</i> CBS 112818 | <i>Trichophyton equinum</i> CBS 127.97 | <i>Arthroderma benhamiae</i> CBS 112371 | <i>Trichophyton verrucosum</i> HKI 0517 | <i>Arthroderma gypseum</i> CBS 118893 | <i>Trichophyton rubrum</i> CBS 118892 | <i>Arthroderma otae</i> CBS 113480 | <i>Neosartorya fischeri</i> NRRL 181 | <i>Aspergillus fumigatus</i> Af293 |                                               |
| TESG_06706                               | TEQG_05350 (100 %)                     | ARB_00534 (88%)                         | TRV_00390 (83%)                         | MGYG_0659 2 (75%)                     | TERG_08361 (90%)                      | MCYG_0360 2 (77 %)                 | NFIA_1122 00 (57%)                   | AFUA_7G0 0200 (52%)                | C6 transcription factor                       |
| TESG_06705                               | TEQG_05349 (100 %)                     | ARB_00535 (91%)                         | TRV_00389 (75%)                         | MGYG_0659 1 (79%)                     | TERG_08360 (91%)                      | MCYG_0360 1 (79 %)                 | NFIA_1122 10 (66%)                   | AFUA_7G0 0190 (65%)                | metallo- $\beta$ -lactamase-like thioesterase |
| TESG_06704                               | TEQG_05348 (41 %)*                     | ARB_00536 (90%)                         | TRV_00388 (91%)                         | MGYG_0659 0 (80%)                     | TERG_08359 (89%)                      | MCYG_0360 0 (83 %)                 | NFIA_1122 20 (67%)                   | AFUA_7G0 0180 (67%)                | flavin-dependent monooxygenase                |
| TESG_06703                               | TEQG_05347 (99 %)                      | ARB_00537 (96%)                         | TRV_00387 (95%)                         | MGYG_0658 9 (92%)                     | TERG_08358 (94%)                      | MCYG_0359 9 (90 %)                 | NFIA_1122 30 (64%)                   | AFUA_7G0 0170 (65%)                | prenyltransferase                             |
| TESG_06702                               | TEQG_05346 (98 %)                      | ARB_00538 (94%)                         | TRV_00386 (93%)                         | MGYG_0658 8 (88%)                     | TERG_08357 (94%)                      | MCYG_0359 8 (89 %)                 | NFIA_1122 40 (77%)                   | AFUA_7G0 0160 (76%)                | non-reducing polyketide synthase              |
| TESG_06701                               | TEQG_05345 (71 %)                      | ARB_00539 (93%)                         | TRV_00385 (93%)                         | MGYG_0658 7 (90%)                     | TERG_08356 (74%)                      | -                                  | -                                    | -                                  | dioxygenase                                   |
| TESG_06700                               | TEQG_05344 (95 %)                      | ARB_00540 (88%)                         | TRV_00384 (88%)                         | MGYG_0886 7 (90%)                     | -                                     | -                                  | -                                    | -                                  | hypothetical protein                          |
| TESG_06699                               | TEQG_05343 (91 %)                      | ARB_00541 (88%)                         | TRV_00383 (88%)                         | MGYG_0886 6 (76%)                     | -                                     | -                                  | -                                    | -                                  | major facilitator superfamily transporter     |
| TESG_06698                               | Poor sequence*                         | ARB_00542 (97%)                         | TRV_00382 (96%)                         | MGYG_0886 5 (95%)                     | -                                     | -                                  | -                                    | -                                  | asp/glu racemase                              |
| TESG_06697                               | TEQG_05342 (100 %)                     | ARB_00543 (95%)                         | TRV_00381 (96%)                         | MGYG_0886 4 (92%)                     | -                                     | -                                  | -                                    | -                                  | dioxygenase                                   |
| TESG_06696                               | TEQG_05341 (99 %)                      | -                                       | -                                       | MGYG_0886 1 (42%)                     | -                                     | -                                  | -                                    | -                                  | glycoside hydrolase                           |
| TESG_06695                               | TEQG_05340 (99 %)                      | ARB_00544 (90%)                         | TRV_00380 (90%)                         | MGYG_0886 0 (91%)                     | TERG_08355 (94%)                      | -                                  | -                                    | -                                  | alcohol dehydrogenase                         |

\* Poor sequencing in the genome database to lead to TEQG\_05348 shorter coding region than other FMO homologs.

**Table S4. NMR assignment for neosartoricin B in CDCl<sub>3</sub> (500 MHz)**

| no.      | $\delta_H$ , mult. ( <i>J</i> in Hz) | $\delta_C$ | HMBC                             |
|----------|--------------------------------------|------------|----------------------------------|
| 1        |                                      | 200.4      |                                  |
| 2        | 4.45, s                              | 76.6       | C-1                              |
| 3        |                                      | 75.5       |                                  |
| 4        | 3.04, d (17.2)<br>3.37, d (17.5)     | 36.4       | C-3, C-4a, C-5                   |
| 4a       |                                      | 140.8      |                                  |
| 5        |                                      | 130.2      |                                  |
| 5a       |                                      | 125.8      |                                  |
| 6        | 6.61, d, 1.6                         | 100.5      | C-5a, C-8                        |
| 7        |                                      | 160.7      |                                  |
| 8        | 6.32, brs                            | 101.6      | C-6, C-7, C-9a                   |
| 9        |                                      | 160.2      |                                  |
| 9a       |                                      | 106.6      |                                  |
| 10       |                                      | 163.1      |                                  |
| 10a      |                                      | 107.6      |                                  |
| 11       | 2.78, d (15)<br>2.93, d (15)         | 46.7       | C-3, C-4, C-12<br>C-3, C-4, C-12 |
| 12       |                                      | 193.2      |                                  |
| 13       | 5.68, s                              | 102.2      | C-14, C-15, C-11                 |
| 14       |                                      | 190.4      |                                  |
| 15       | 2.11, s                              | 24.5       | C-13, C-14                       |
| 16       | 3.42, d (6.3)<br>3.36, d (6.7)       | 27.3       | C-4a, C-5, C-5a, C-17            |
| 17       | 4.98, s                              | 121.6      | C-20, C-19, C-5                  |
| 18       |                                      | 132.8      |                                  |
| 19       | 1.81, s                              | 18.2       | C-17, C18, C-20                  |
| 20       | 1.69, s                              | 25.8       | C-17, C-19, C18                  |
| 2-OH     | 2.31 (1H, s)                         |            | C-1, C-2                         |
| 3-OH     | 6.04 (1H, brs)                       |            |                                  |
| 7-OH     | n.a                                  |            |                                  |
| 9-OH     | 9.79 (1H, s)                         |            | C-9, C-8, C-9a                   |
| 10-OH    | 14.9 (1H, s)                         |            | C-10, C-9a, C-9                  |
| 14-OH(a) | 15.37 (1H, brs)                      |            |                                  |

n.a: not assigned

**Table S5. NMR assignment for neosartoricin C in CDCl<sub>3</sub> (500 MHz)**

| no.   | $\delta_{\text{H}}$ , mult. ( <i>J</i> in Hz) | $\delta_{\text{C}}$ | HMBC                       |
|-------|-----------------------------------------------|---------------------|----------------------------|
| 1     |                                               | 199.2               |                            |
| 2     | 4.45, s                                       | 76.2                | C-1                        |
| 3     |                                               | 84.6                |                            |
| 4     | 2.69, d (17.0)                                | 32.4                | C-5, C-4a                  |
|       | 3.86, d (17.0)                                |                     | C-3, C-2, C-10a, C-5, C-4a |
| 4a    |                                               | 129.3               |                            |
| 5     |                                               | 125.0               |                            |
| 5a    |                                               | 140.8               |                            |
| 6     | 6.75, d (2.1)                                 | 100.5               | C-8, C-9a, C-7, C-5        |
| 7     |                                               | 160.6               |                            |
| 8     | 6.52, d (2.1)                                 | 102.0               | C-6, C-9a, C-9             |
| 9     |                                               | 161.0               |                            |
| 9a    |                                               | 107.8               |                            |
| 10    |                                               | 163.0               |                            |
| 10a   |                                               | 106.5               |                            |
| 11    | 2.43, d (16.4)                                | 41.8                | C-12, C-4                  |
|       | 3.44, d (16.4)                                |                     | C-12, C-4, C-3, C-2        |
| 12    |                                               | 191.3               |                            |
| 13    | 5.34, s                                       | 103.9               | C-11, C-14, C-15           |
| 14    |                                               | 172.1               |                            |
| 15    | 1.73, s                                       | 21.1                | C-14, C-13                 |
| 16    | 3.38, m                                       | 27.2                | C-18, C-4a, C-17, C5, C5a  |
| 17    | 4.82, m                                       | 121.1               | C-5, C-19, C-20            |
| 18    |                                               | 133.4               |                            |
| 19    | 1.78, s                                       | 18.3                |                            |
| 20    | 1.66, s                                       | 25.7                |                            |
| 10-OH | 14.86, s                                      |                     | C-10, C-10a, C-9a          |
| 9-OH  | 9.85, s                                       |                     | C-9, C9a, C-8              |

n.a: not assigned

**Table S6. NMR assignment for neosartoricin D in CDCl<sub>3</sub> (500 MHz)**

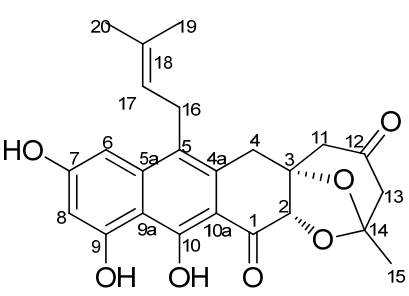

| no.   | $\delta_{\text{H}}$ , mult. ( <i>J</i> in Hz) | $\delta_{\text{C}}$ |
|-------|-----------------------------------------------|---------------------|
| 1     |                                               | 203.6               |
| 2     | 4.46, s                                       | 80.5                |
| 3     |                                               | 78.3                |
| 4     | 2.99, d (17.6)<br>3.63, d (17.6)              | 32.2                |
| 4a    |                                               | 128.9               |
| 5     |                                               | 125.2               |
| 5a    |                                               | 141.5               |
| 6     | 6.69, d (2.1)                                 | 100.9               |
| 7     |                                               | 160.9               |
| 8     | 6.46, d (2.1)                                 | 101.7               |
| 9     |                                               | 162.0               |
| 9a    |                                               | 108.2               |
| 10    |                                               | 168.9               |
| 10a   |                                               | 106.2               |
| 11    | 2.59, d (16.8)<br>2.76, d (16.8)              | 51.1                |
| 12    |                                               | 196.3               |
| 13    | 2.70, s                                       | 50.1                |
| 14    |                                               | 108.6               |
| 15    | 1.72, s                                       | 24.6                |
| 16    | 3.48, m                                       | 27.4                |
| 17    | 4.99, t (6.7)                                 | 121.2               |
| 18    |                                               | 133.4               |
| 19    | 1.85, s                                       | 18.4                |
| 20    | 1.51, s                                       | 25.8                |
| 10-OH | n.a                                           |                     |
| 9-OH  | 10.4, s                                       |                     |
| 7-OH  | 5.46, s                                       |                     |

n.a: not assigned

### Supplementary NMR spectra for neosartoricin B

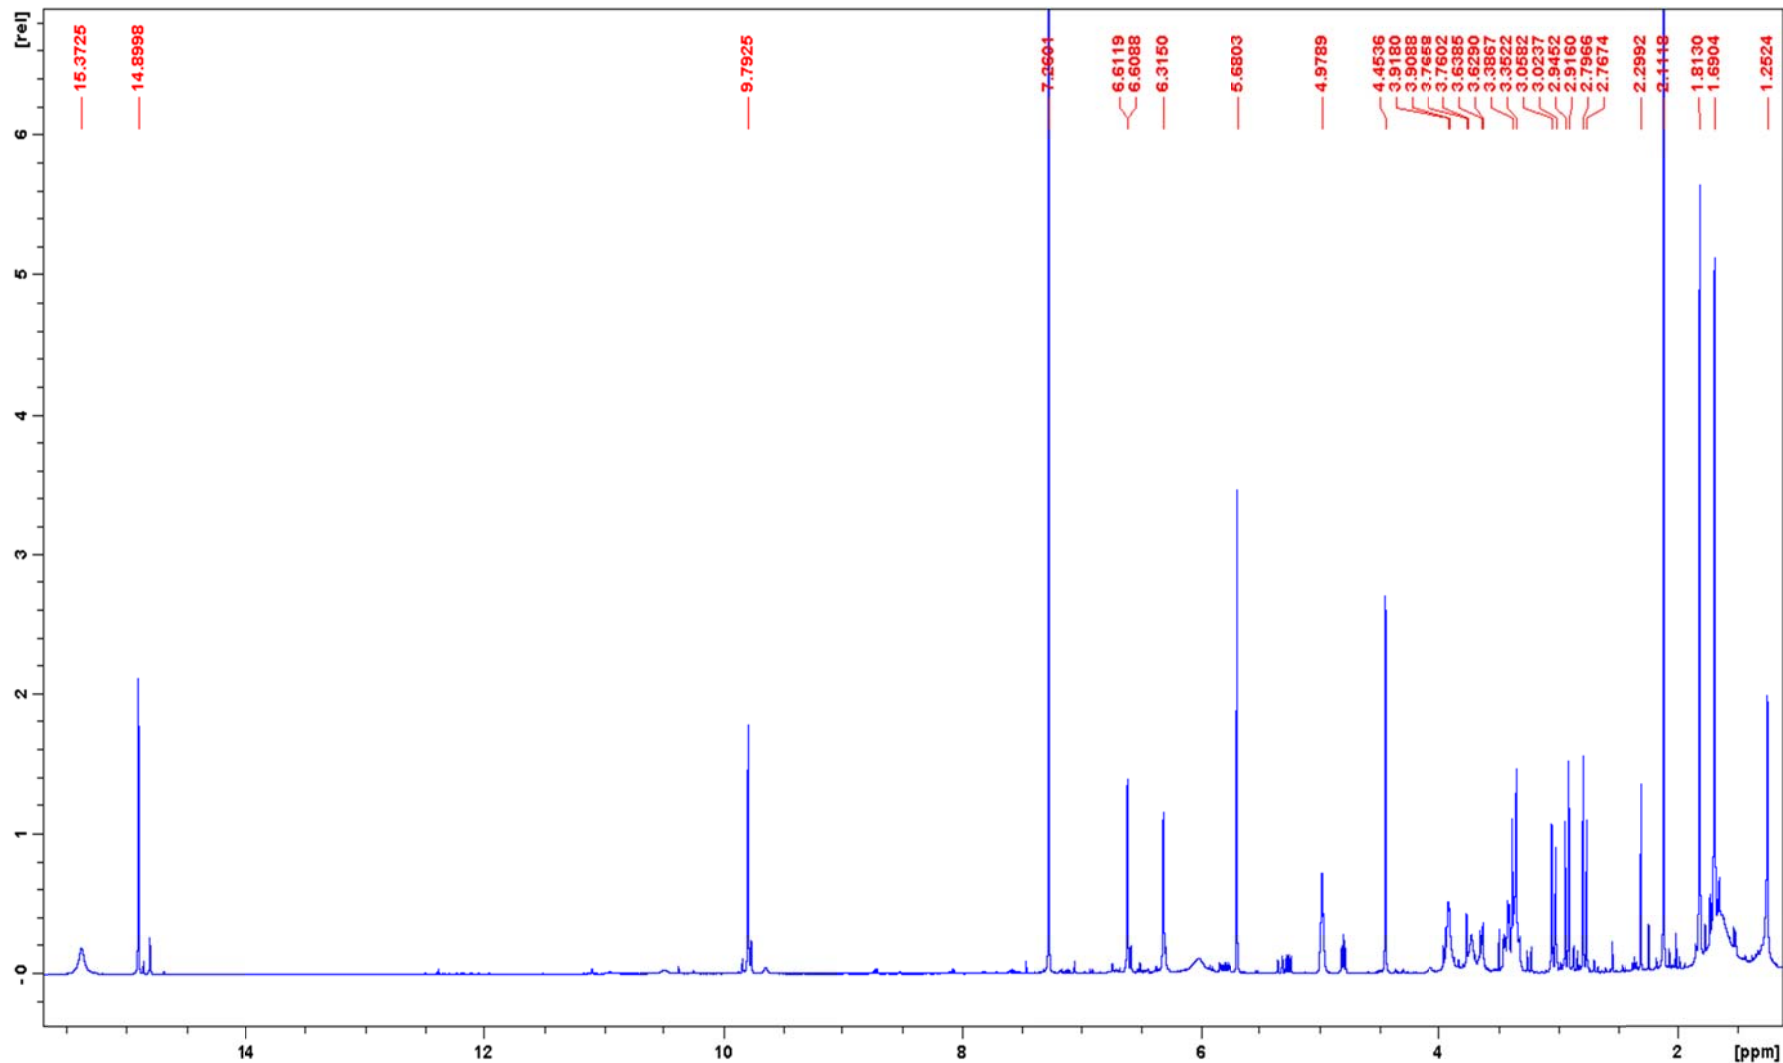

<sup>1</sup>H-NMR spectrum of neosartoricin B in CDCl<sub>3</sub> measured on 500 MHz Bruker NMR spectrometer (see Table S4 for peak assignments)

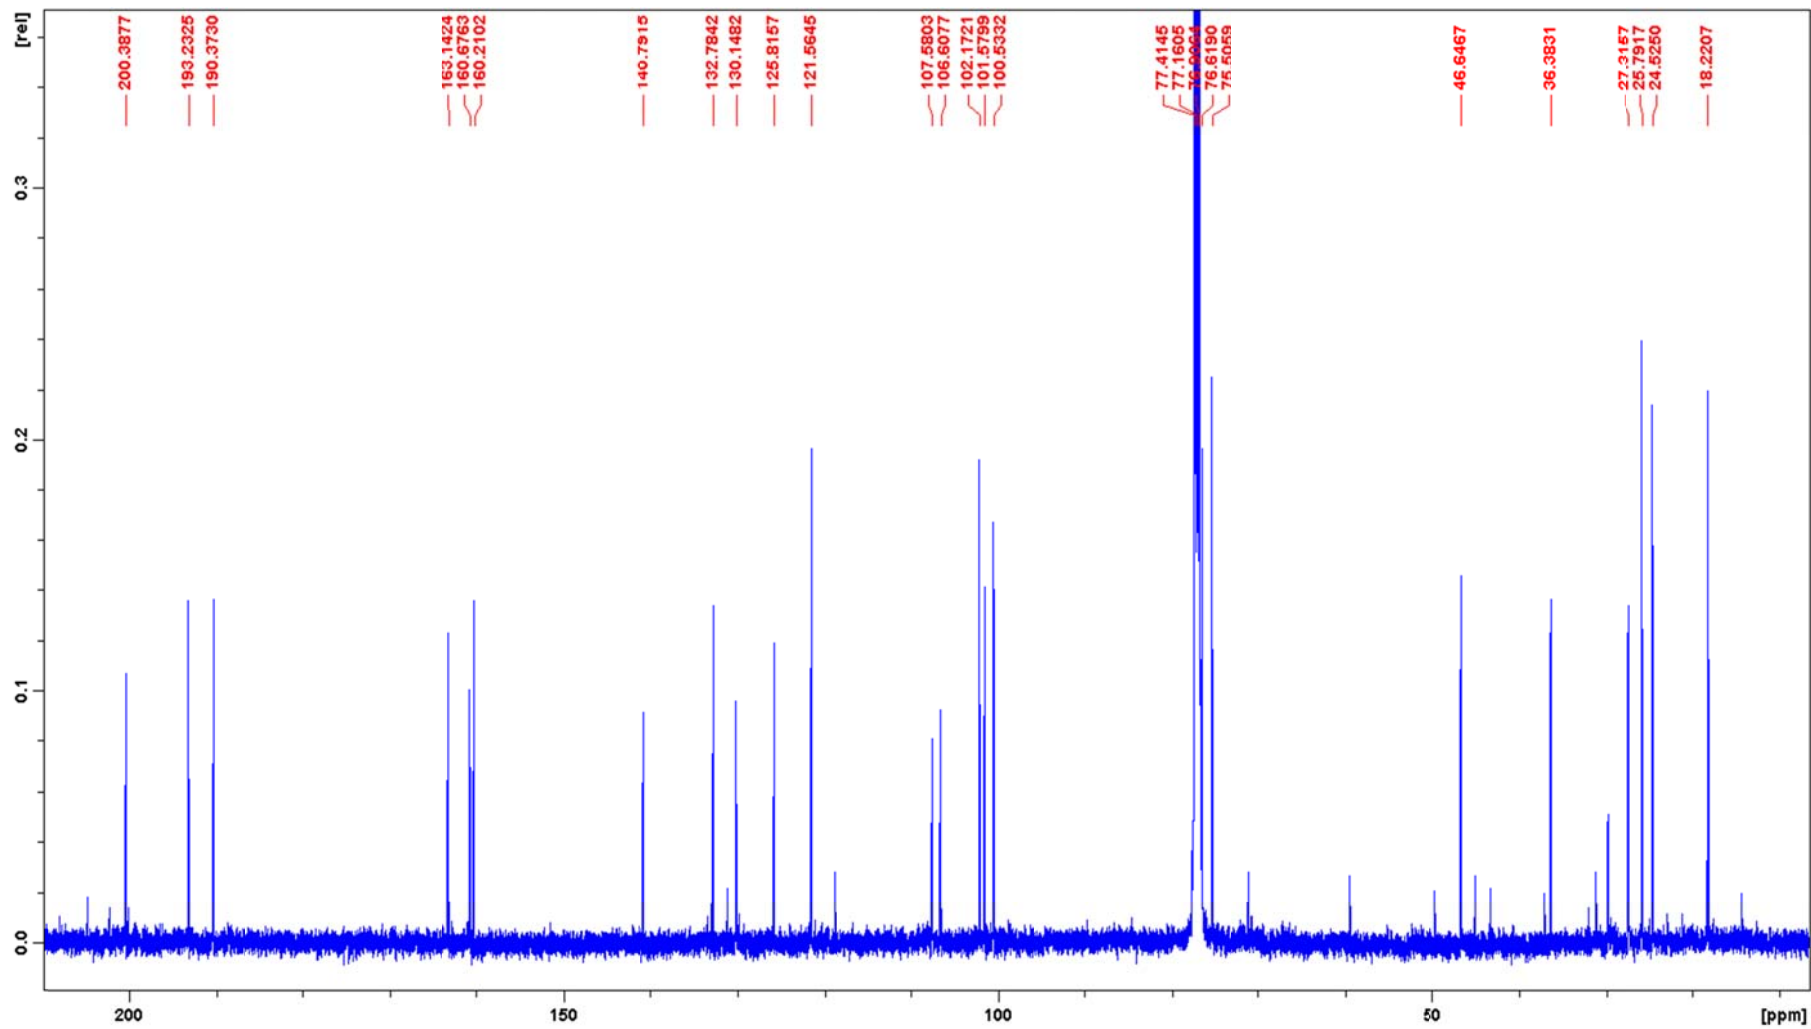

<sup>13</sup>C-NMR spectrum of neosartoricin B in CDCl<sub>3</sub> measured on 500 MHz Bruker NMR spectrometer (see Table S4 for peak assignments)

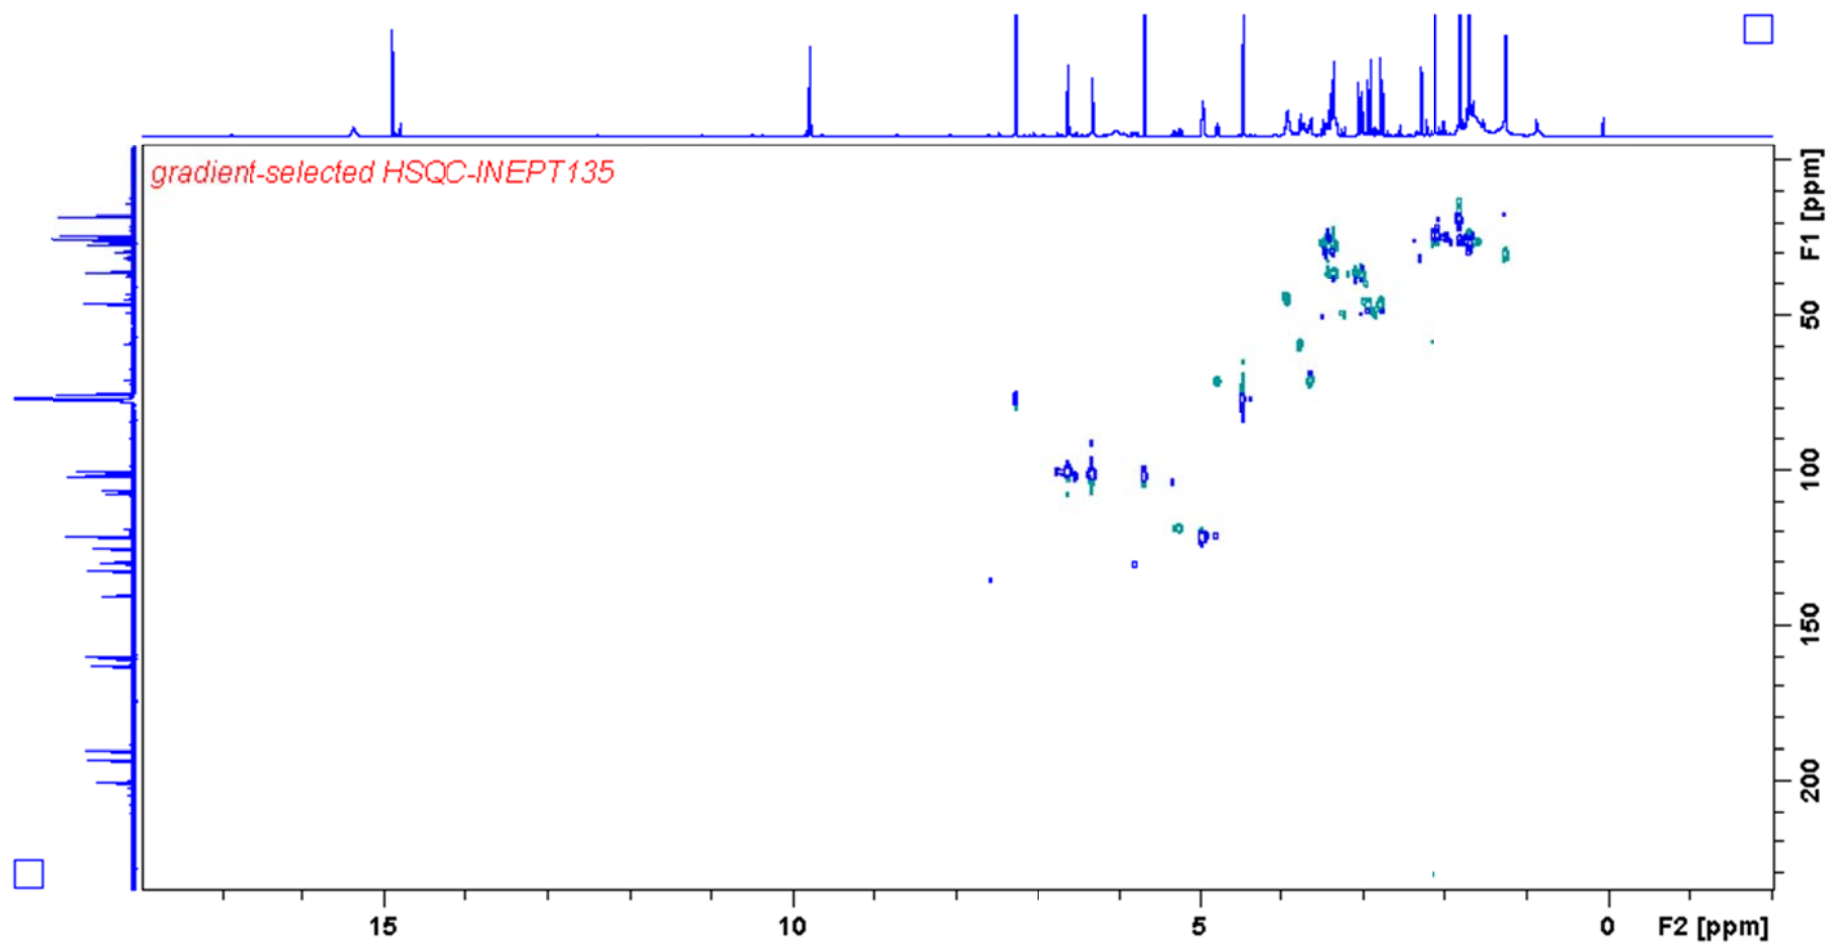

$^1\text{H}$ - $^{13}\text{C}$  HSQC spectrum of neosartoricin B in  $\text{CDCl}_3$  measured on 500 MHz Bruker NMR spectrometer (see Table S4 for peak assignments)



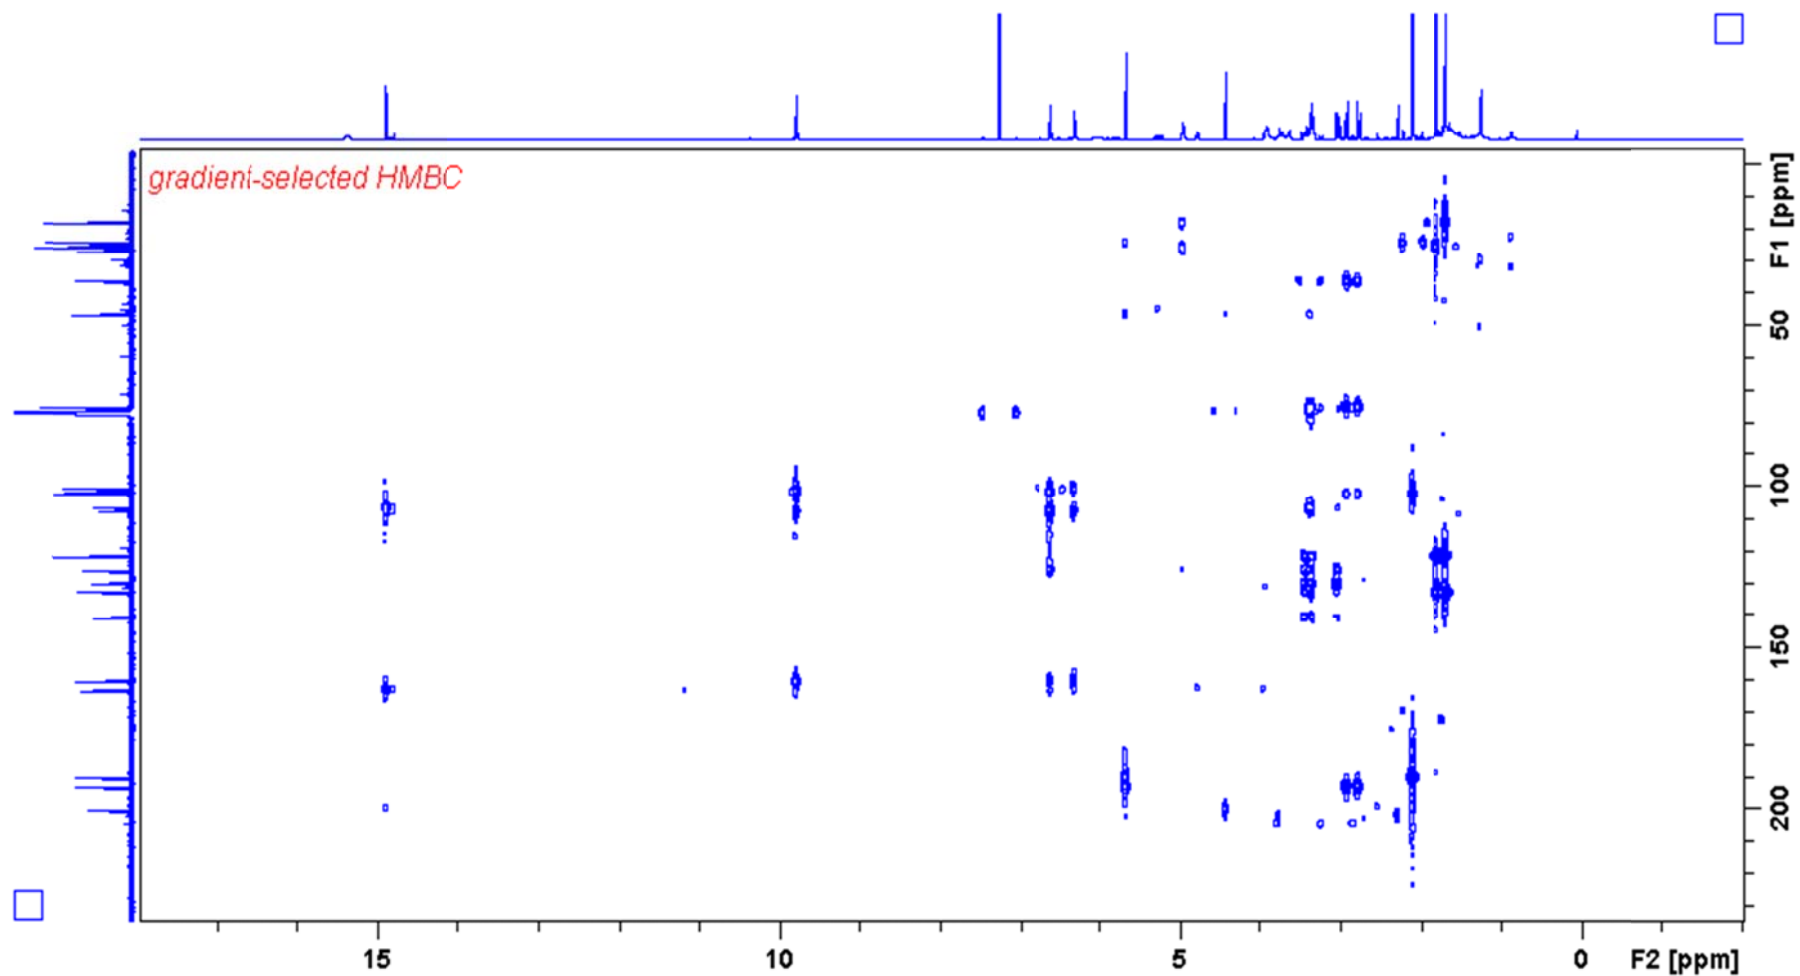

$^1\text{H}$ - $^{13}\text{C}$  HMBC spectrum of neosartoricin B in  $\text{CDCl}_3$  measured on 500 MHz Bruker NMR spectrometer (see Table S4 for peak assignments)

### Supplementary NMR spectra for neosartoricin C

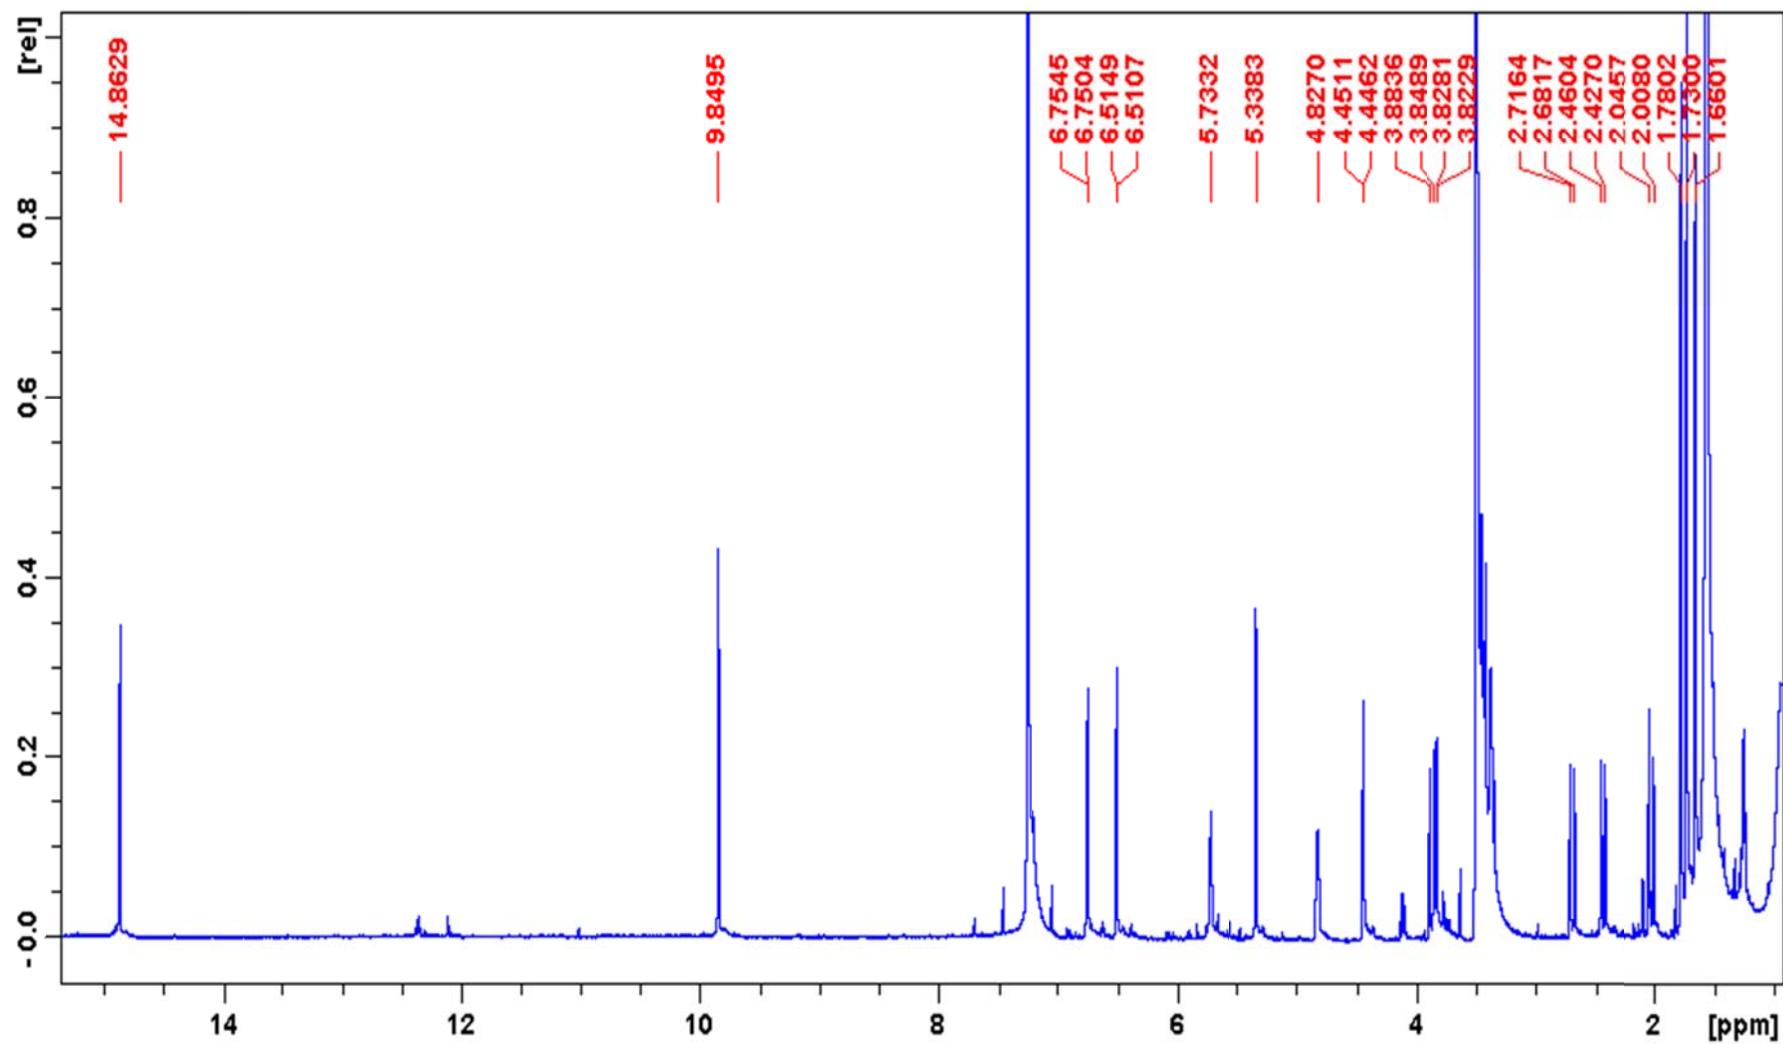

<sup>1</sup>H-NMR spectrum of neosartoricin C in CDCl<sub>3</sub> measured on 500 MHz Bruker NMR spectrometer (see Table S5 for peak assignments)

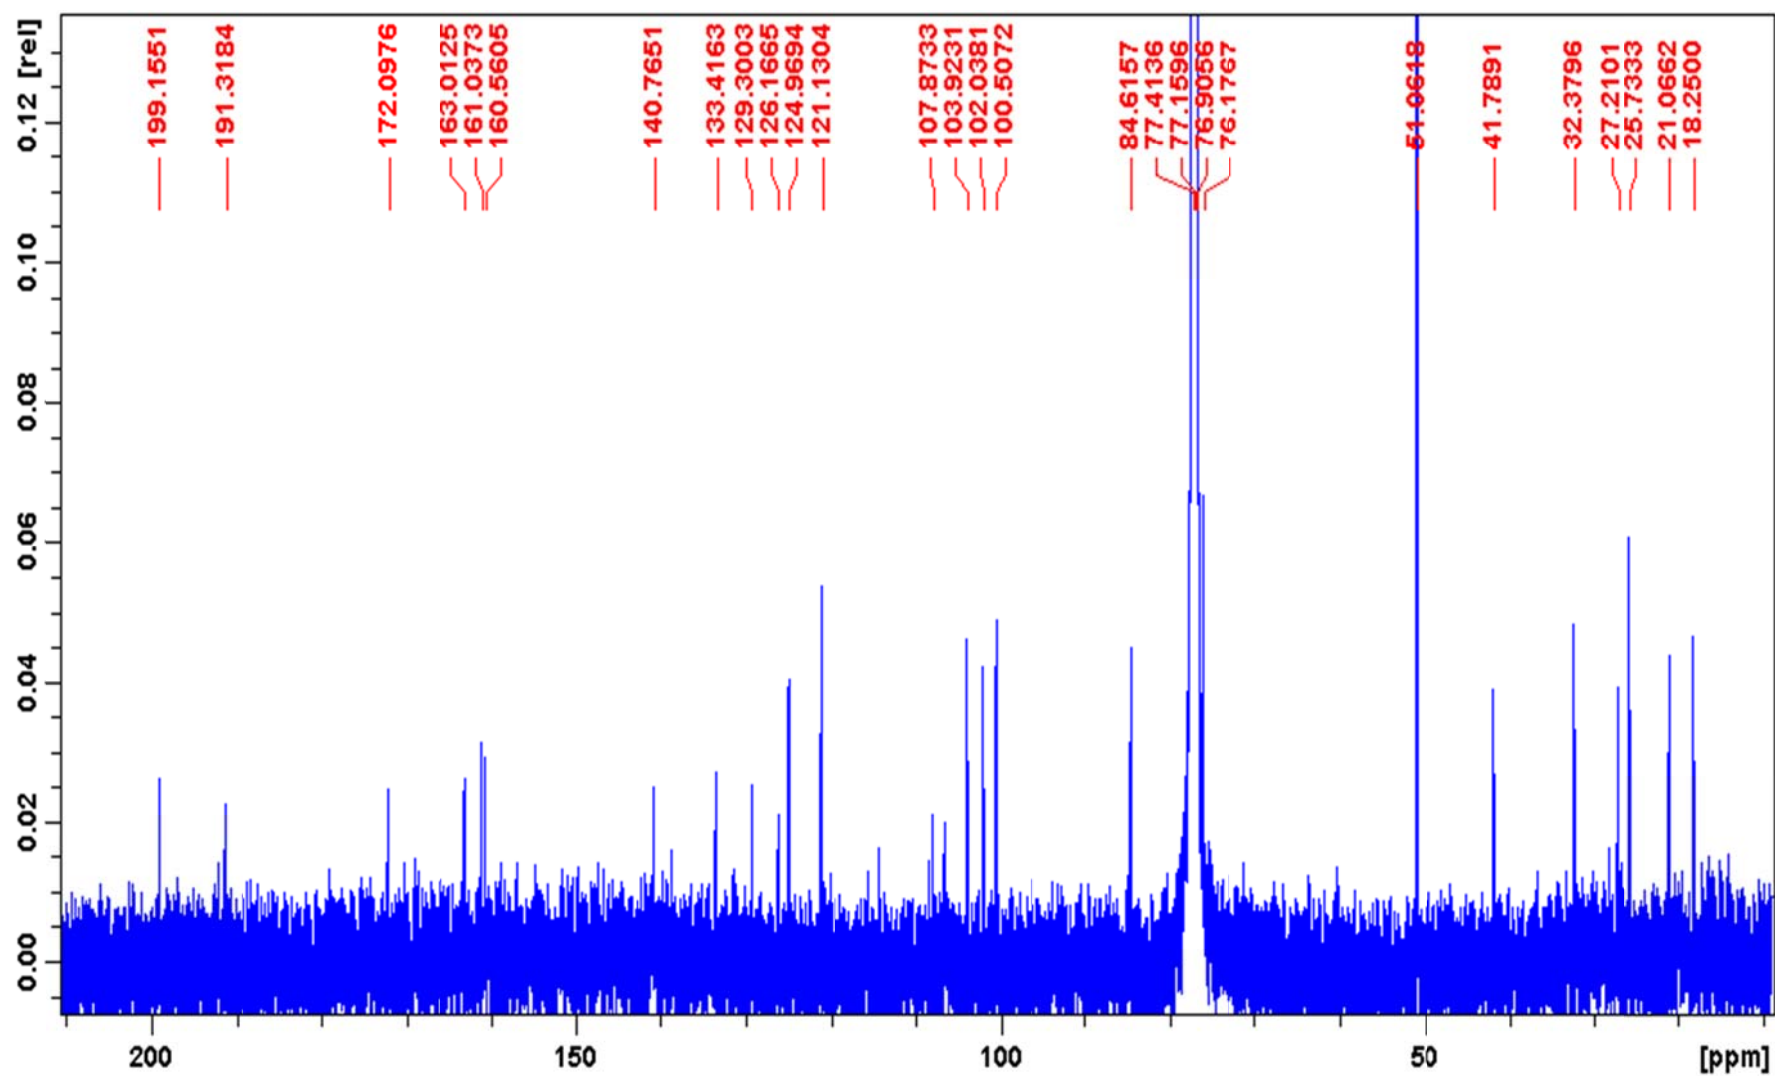

<sup>13</sup>C-NMR spectrum of neosartoricin C in CDCl<sub>3</sub> measured on 500 MHz Bruker NMR spectrometer (see Table S5 for peak assignments)

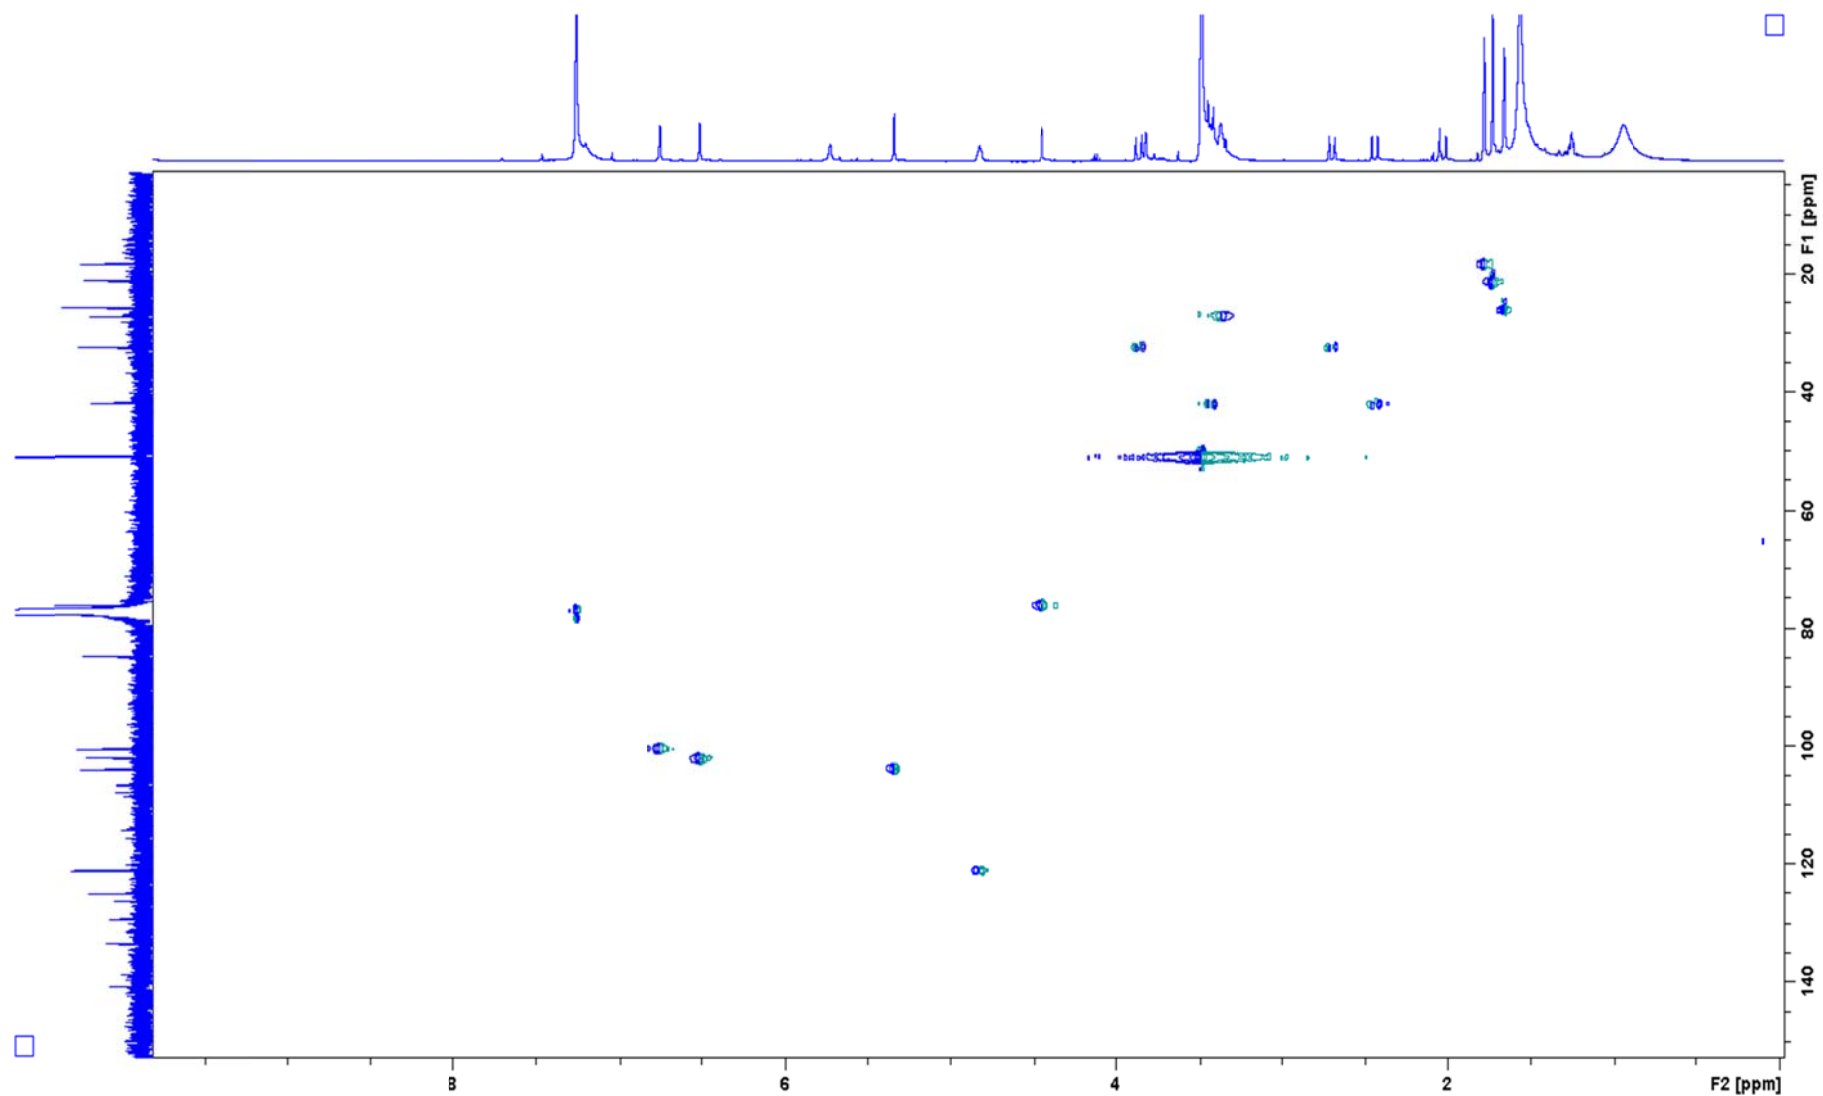

**$^1\text{H}$ - $^{13}\text{C}$  HSQC spectrum of neosartoricin C in  $\text{CDCl}_3$  measured on 500 MHz Bruker NMR spectrometer (see Table S5 for peak assignments)**

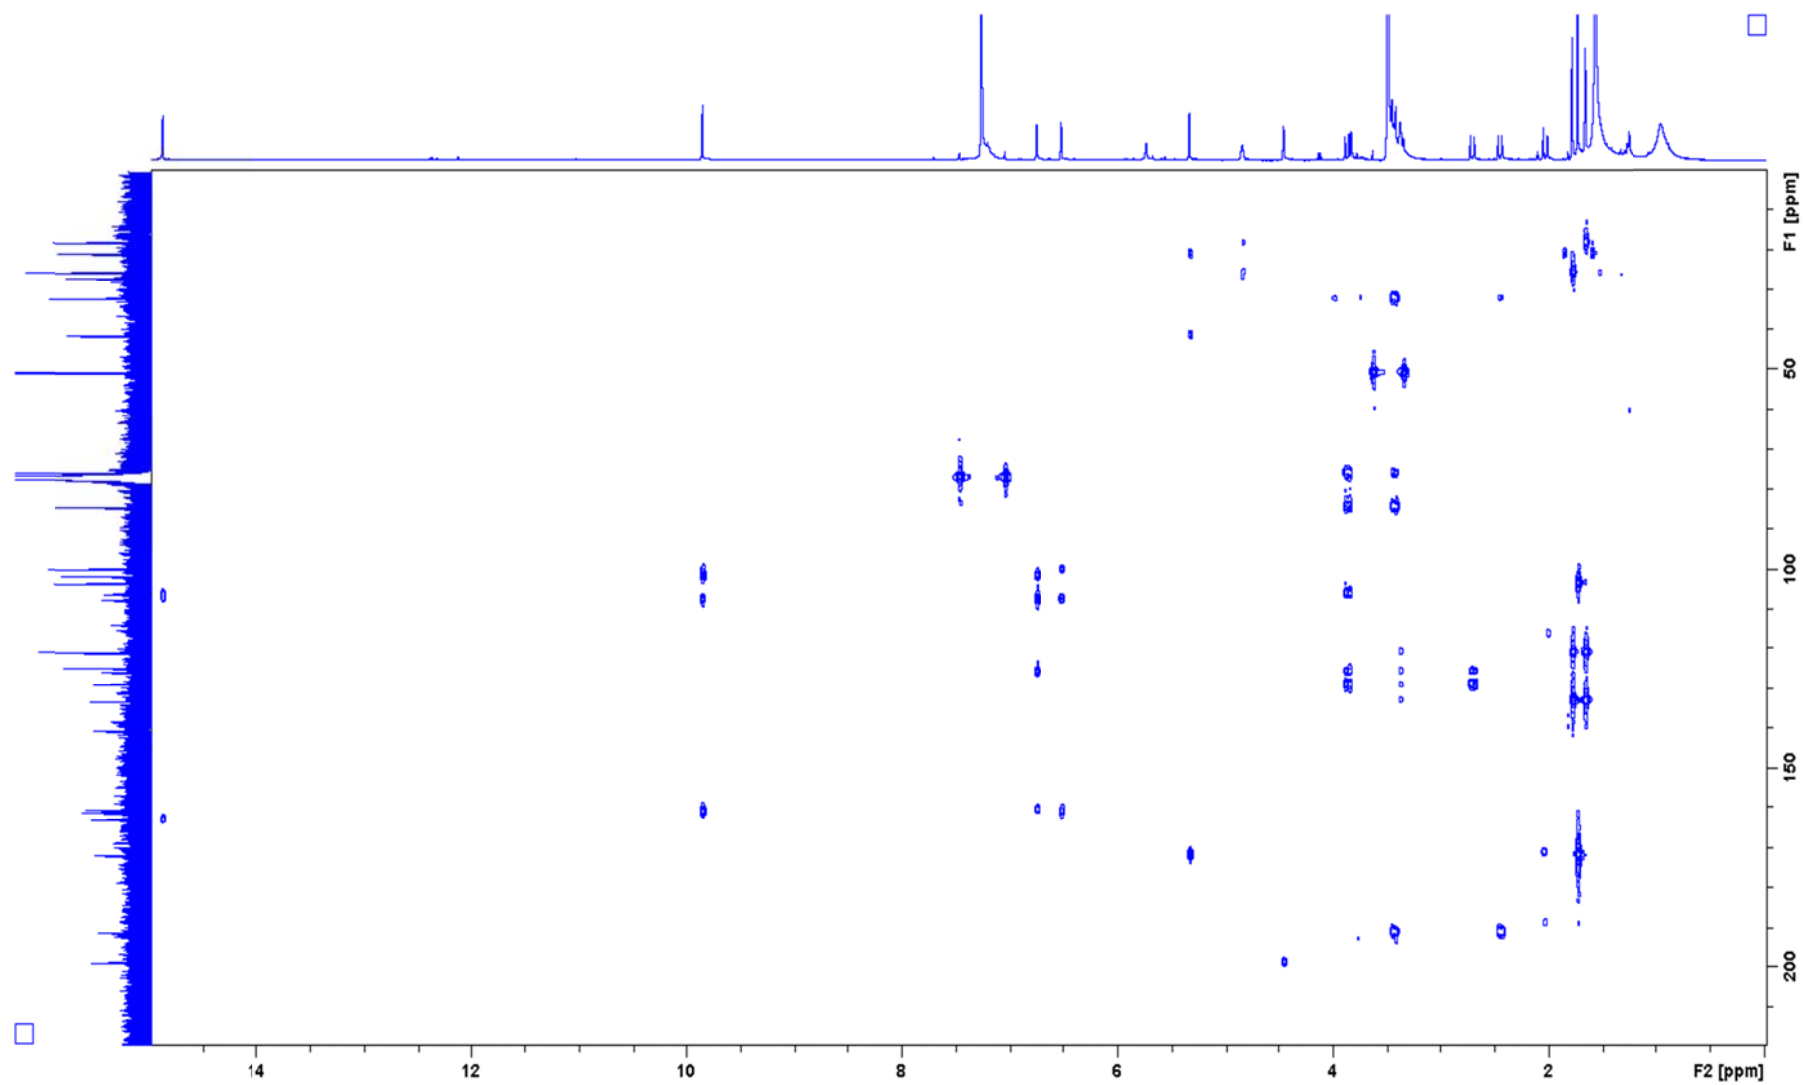

$^1\text{H}$ - $^{13}\text{C}$  HMBC spectrum of neosartoricin C in  $\text{CDCl}_3$  measured on 500 MHz Bruker NMR spectrometer (see Table S5 for peak assignments)

### Supplementary NMR spectra for neosartoricin D

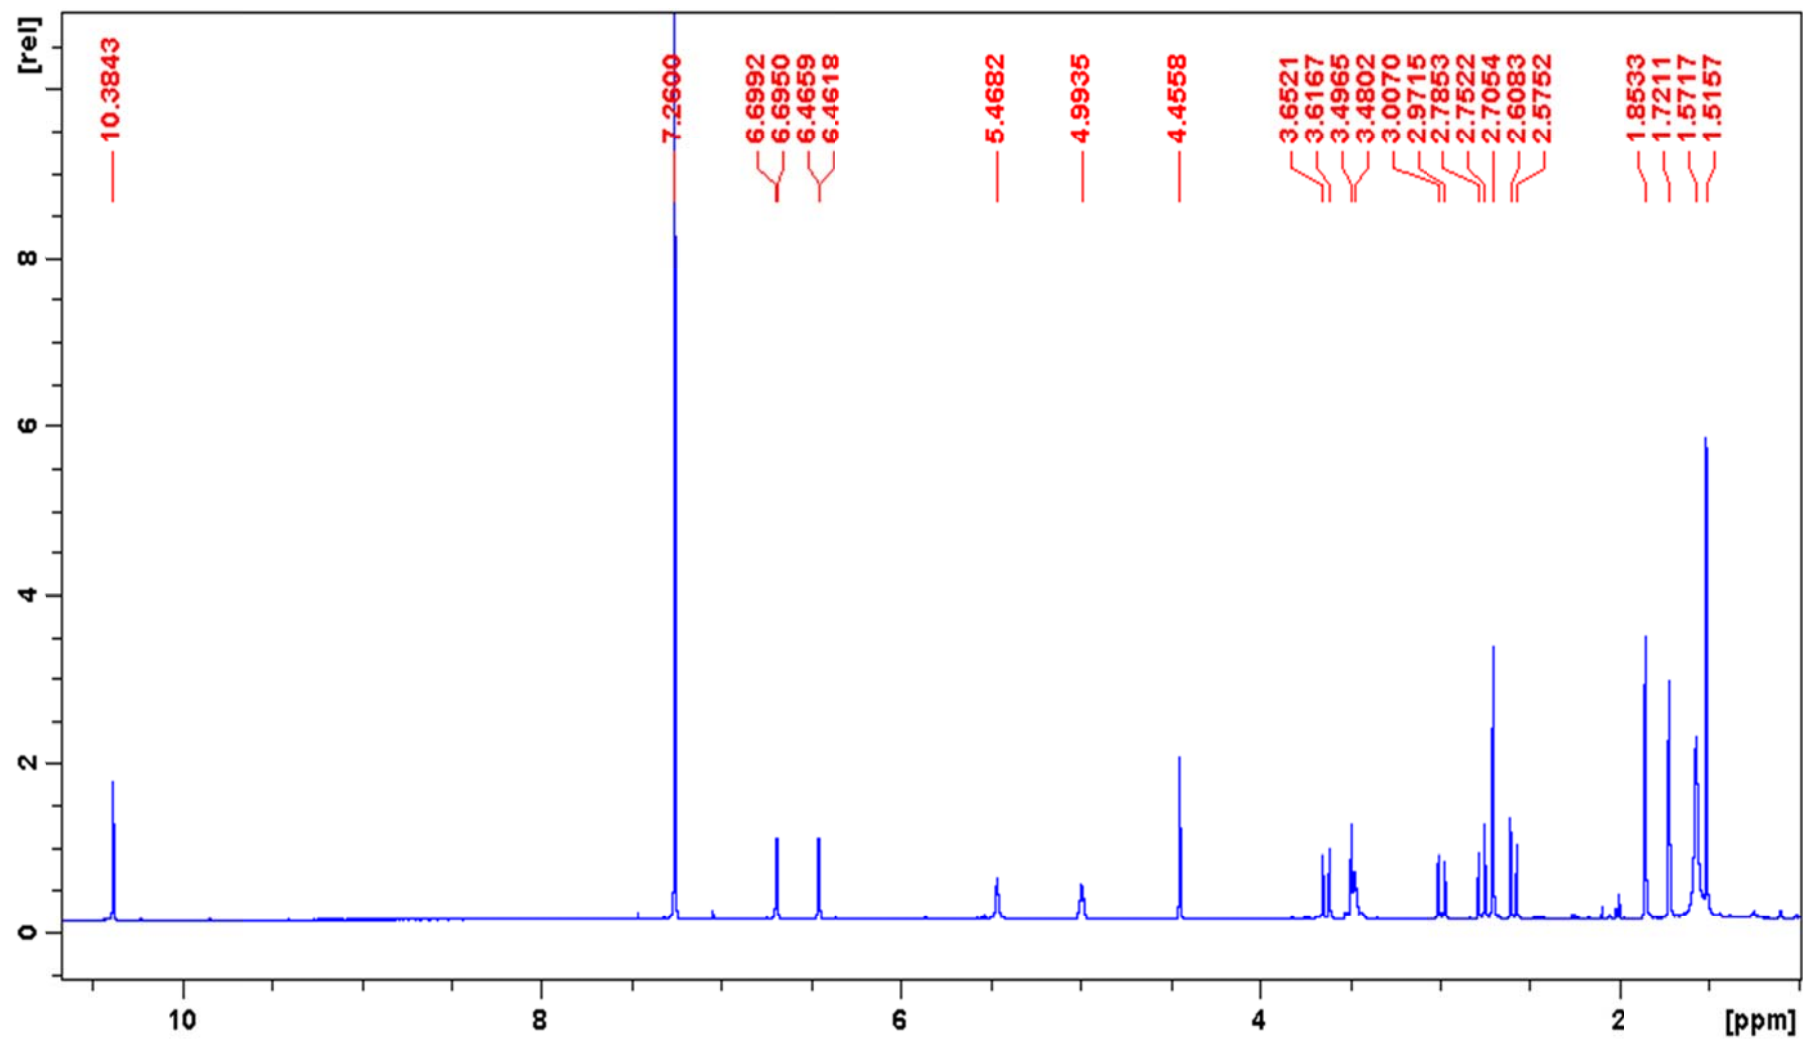

<sup>1</sup>H-NMR spectrum of neosartoricin D in CDCl<sub>3</sub> measured on 500 MHz Bruker NMR spectrometer (see Table S6 for peak assignments)

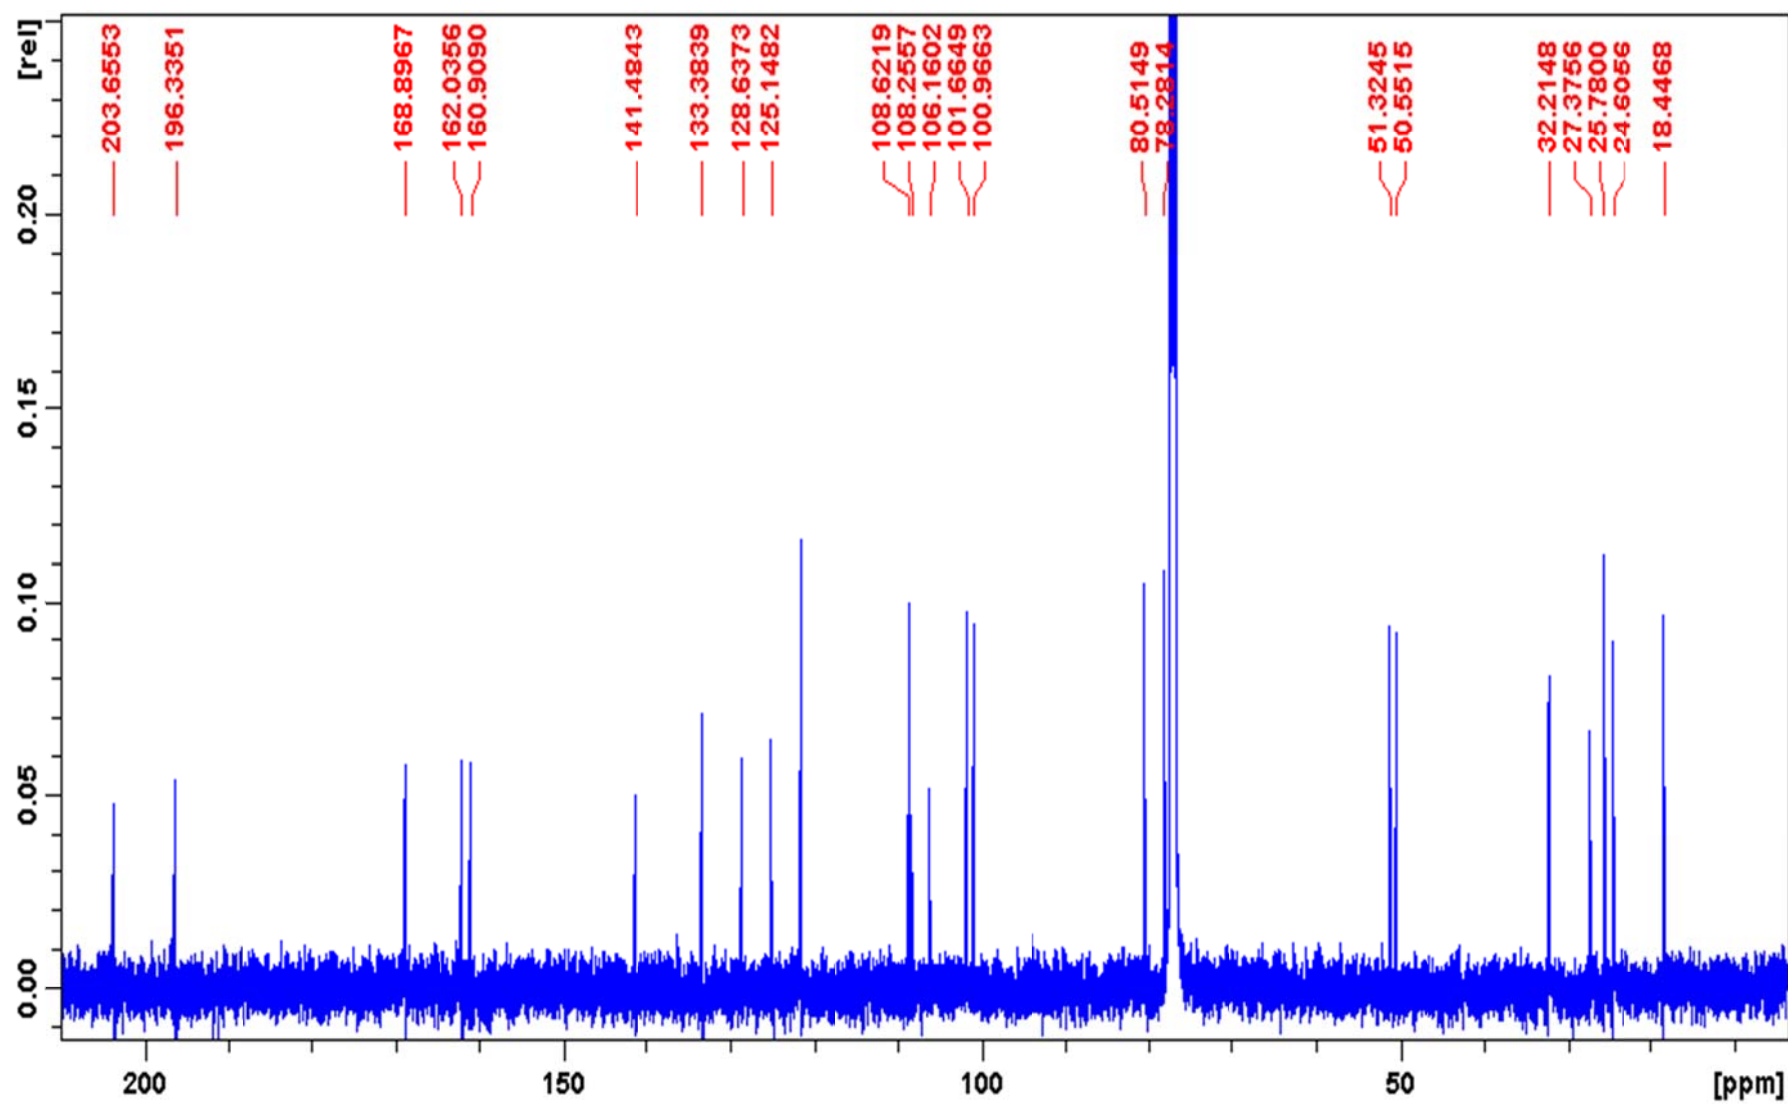

<sup>13</sup>C-NMR spectrum of neosartoricin D in CDCl<sub>3</sub> measured on 500 MHz Bruker NMR spectrometer (see Table S6 for peak assignments)

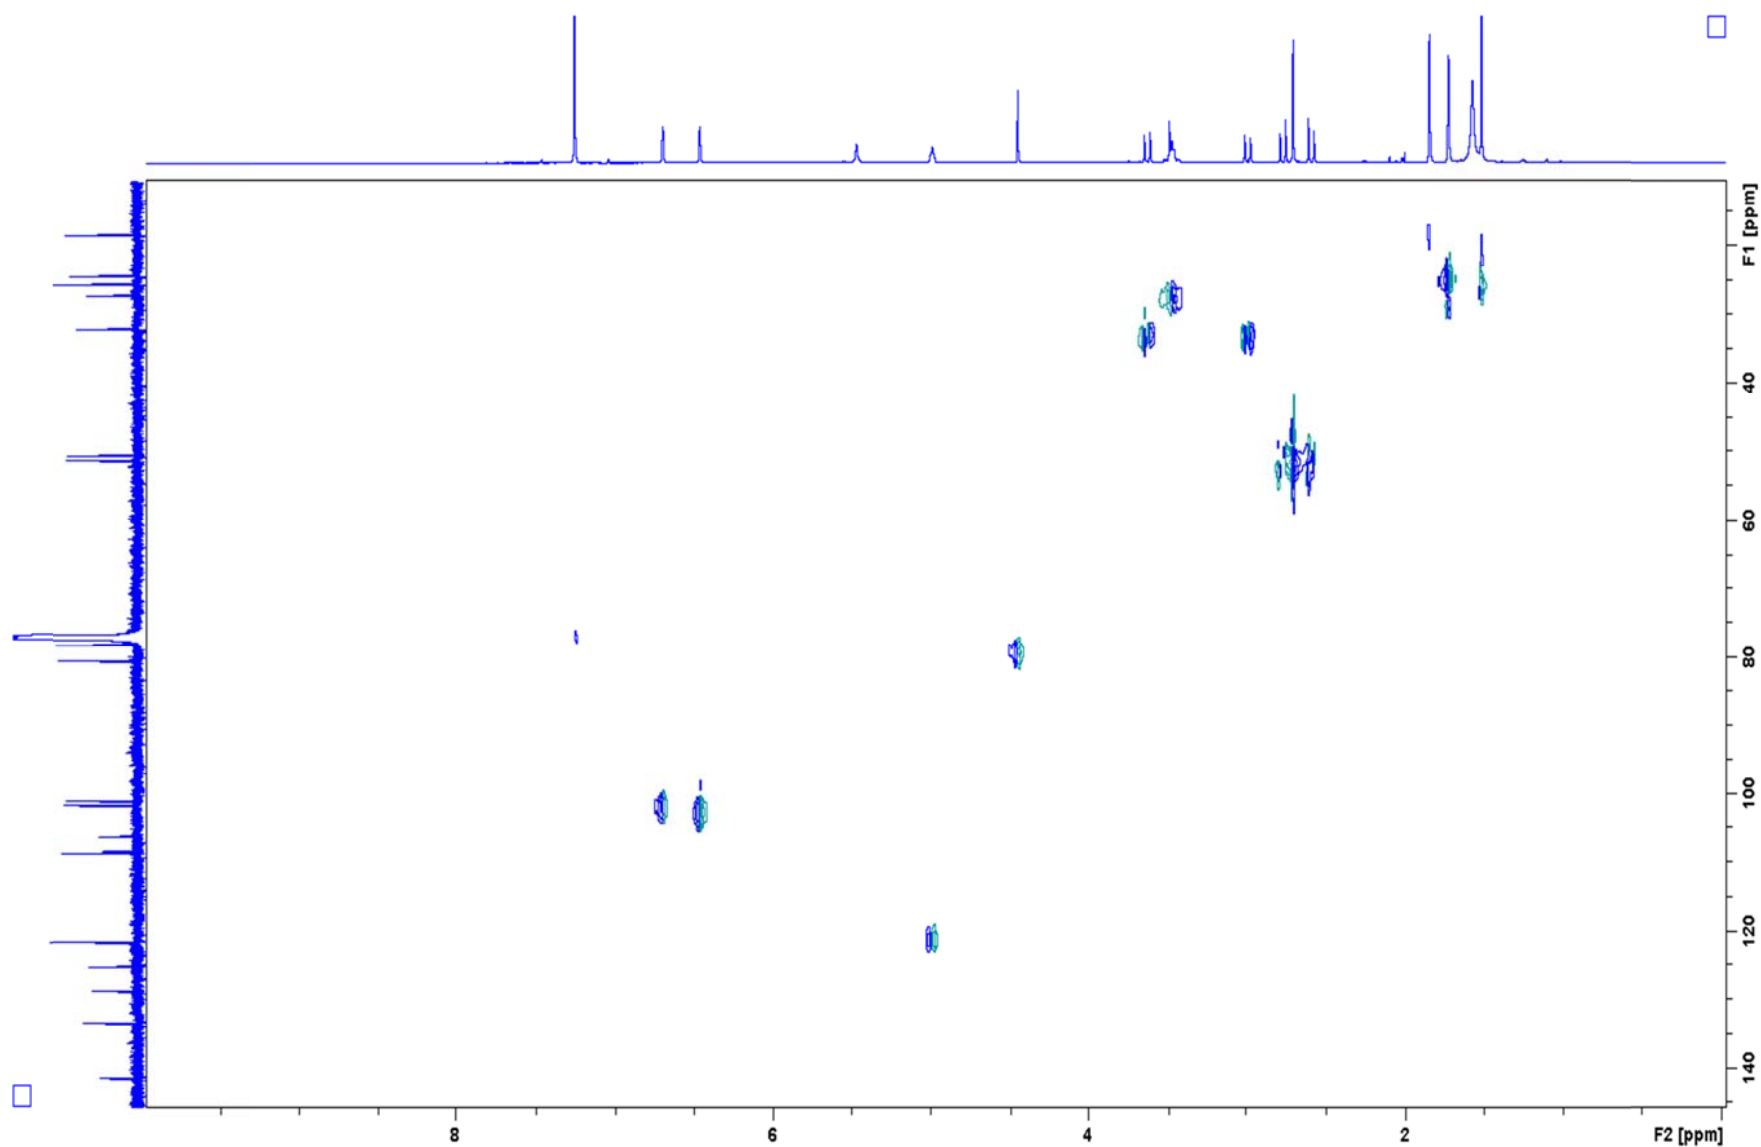

**$^1\text{H}$ - $^{13}\text{C}$  HSQC spectrum of neosartoricin D in  $\text{CDCl}_3$  measured on 500 MHz Bruker NMR spectrometer (see Table S6 for peak assignments)**



## Supplementary References

1. Colot, H. V., Park, G., Turner, G. E., Ringelberg, C., Crew, C. M., Litvinkova, L., Weiss, R. L., Borkovich, K. A., and Dunlap, J. C. (2006) A high-throughput gene knockout procedure for *Neurospora* reveals functions for multiple transcription factors, *Proc Natl Acad Sci U S A* 103, 10352-10357.
2. Yin, W. B., Amaike, S., Wohlbach, D. J., Gasch, A. P., Chiang, Y. M., Wang, C. C., Bok, J. W., Rohlf, M., and Keller, N. P. (2012) An *Aspergillus nidulans* bZIP response pathway hardwired for defensive secondary metabolism operates through *aflR*, *Mol. Microbiol.* 83, 1024-1034.
